# Supplementary material for: Woody Species Composition, Vegetation Structure, and Regeneration Status of Majang Forest Biosphere Reserves in Southwestern Ethiopia
Source: Hindawi journal article supplement (doi:10.1155/2021/5534930), 2021-06-03
Supplement: f1 [file 5534930.f1.docx]

**APPENDICES**

**Appendix 1: List of species in MFBR**

| No | Scientifica Name | Local Name | Family Name | Hab. |
| --- | --- | --- | --- | --- |
| 1 | *Acacia polyacantha Wild* | Sesem | *Fabaceae* | L |
| 2 | *Acalypha orbata A.R* | Kirsan | *Euporbiaceae* | S |
| 3 | *Acanthopale ethio-germanica Ensermu* | Huxxo | *Acanthaceae* | S |
| 4 | *Acanthopale pubescens (Lindau ex Engl.) CB. Clarke* | Shengi | *Acanthaceae* | S |
| 5 | *Achyranthes aspera L.* | Utigaric | *Amaranthaceae* | H |
| 6 | *Adianthum thalictroides schltd* | Pentie | *Adianthaceae* | H |
| 7 | *Alangium chinense (Lour.) Harms* | Shukushi/Shoto | *Alangiaceae* | T |
| 8 | *Albizia grandibracteata Taub* | Sati | *Fabaceae* | T |
| 9 | *Albizia gummifera (J.F. Gmel.) CA. Sm.* | Seso/Chato | *Fabaceae* | T |
| 10 | *Albizia Schimperiana Oliv.* | Caatto | *Fabaceae* | T |
| 11 | *Alchemilla fischeri Engl.* | Dolomecho | *Rosaceae* | H |
| 12 | *Allophylus abyssinicus (Hochst.) Radlk.* | Shao/qerero | *Sapindaceae* | T |
| 13 | *Allophylus macrobotrys Gilg* | Beni | *Sapindaceae* | T |
| 14 | *Ampelocissus bombycian(Bak) planch* | Maketeye | *Vitaceae* | L |
| 15 | *Antiaris toxicaria Resch* | Tengi | *Moraceae* | T |
| 16 | *Apodytes dimidiata E. Mey. ex Arn.* | Tokun | *Icacinaceae* | T |
| 17 | *Apodytes dimidiata E. Mey. ex Arn.* | Shotele | *Icacinaceae* | T |
| 18 | *Argomullera macrophyla Pax* | Babush | *Euphorbiaceae* | S |
| 19 | *Aspilia mossambicensis (Oliv.) Wild* | Unknown | *Asteraceae* | H |
| 20 | *Asplenium aethopicum ( Brum.f.) bech* | Unknown | *Aspleniaceae* | H |
| 21 | *Asplenium anisophyllum Kunze* | Unknown | *Aspleniaceae* | H |
| 22 | *Asplenium bugoiense Hieron* | Unknown | *Aspleniaceae* | H |
| 23 | *Asplenium erectum Willd.* | Ameja | *Aspleniaceae* | H |
| 24 | *Asplenium friesiorum C.Chr.* | Unknown | *Aspleniaceae* | H |
| 25 | *Asplenium sandersonii Hook* | Unknown | *Aspleniaceae* | H |
| 26 | *Baphia abyssinica Brummit* | Duwe | *Fabaceae* | T |
| 27 | *Bersama abyssinica Fresen* | Boqo/Boko | *Melianthaceae* | T |
| 28 | *Blighia unijugata Bak.* | Keyang | *Sapindaceae* | T |
| 29 | *Bothriocline schimperi Olivo & Hiern ex Benth.* | Shito | *Asteraceae* | H |
| 30 | *Buddleja polystachya Fresen.* | Usume | *Loganiaceae* | T |
| 31 | *Canthium oligocarpum Hiern* | Xixiribbo | *Rubiaceae* | T |
| 32 | *Capparis tomentosa Lam.* | Rokodhe | *Capparidaceae* | S |
| 33 | *Cassipourea malosana (Baker) Alston* | Weralo | *Rhizophoraceae* | T |
| 34 | *Cayratia gracilis (GuilL. & Perl'.) Suesseng.* | Sonkuye | *Vitaceae* | L |
| 35 | *Celtis africana Burm.f.* | Upuye | *Ulmaceae* | T |
| 36 | *Celtis toka (Forssk. ) hepper.&.Wood* | koke | *Ulmaceae* | T |
| 37 | *Celtis zenkeri (A.Rich) wedd* | kobe | *Urticeaceae* | T |
| 38 | *Clausena anisata (Willd.) Benth.* | Worango | *Rutaceae* | T |
| 39 | *Clematis longicauda Steud. ex A. Rich* | Shaggee qombo | *Ranunculaceae* | L |
| 40 | *Clematis simensis Fresen.* | Phi’o Qombo | *Ranunculaceae* | L |
| 41 | *Coffea arabica L.* | Kari/Bunoo | *Rubiaceae* | T |
| 42 | *Combretum molle R. Br. ex G. Don* | Semberegn | *Combretaceae* | T |
| 43 | *Combretum paniculatum Vent.* | Beji | *Combretaceae* | L |
| 44 | *Cordia Africana Lam.* | Dampe/Dao | *Boraginaceae* | T |
| 45 | *Croton macrostachyus Del.* | Shomo/Gidi | *Euphorbiaceae* | T |
| 46 | *Croton sylvaticus Krauss* | Somoye | *Euphorbiaceae* | T |
| 47 | *Culcasia falcifolia Engl.* | Golkeye | *Araceae* | L |
| 48 | *Cyathea manniana Hook* | Sinsino | *Cyatheaceae* | T |
| 49 | *Dalbergia lactea Vatke* | Gimiro | *Fabaceae* | L |
| 50 | *Deinbollia Kilimandschrica Taub* | Yuye | *Saindaceae* | T |
| 51 | *Diospyros abyssinica (Hiern) F.White* | Kuri | *Ebenaceae* | T |
| 52 | *Dombeya torrida (J.F.Gmel.) P. Bamps* | Woleloye | *Sterculiaceae* | T |
| 53 | *Dracaena afromontana Mildbr.* | Pishino | *Dracaenaceae* | T |
| 54 | *Dracaena fragrans (L.) Ker Gawl.* | Emoo/Emuye | *Dracaenaceae* | S |
| 55 | *Dracaena reflexa var. nitens auct.* | Coqimato | *Dracaenaceae* | T |
| 56 | *Dracaena steudneri Engler* | Ebi/Yuddo | *Dracaenaceae* | T |
| 57 | *Dregea schimperi (Decne.) Bullock* | Bitkot | *Asclepiadaceae* | L |
| 58 | *Ehretia cymosa Thonn.* | Wagaamo | *Boraginaceae* | T |
| 59 | *Ekebergia capensis Sparrm* | Orero | *Meliaceae* | T |
| 60 | *Elaeodendron buchananii (Loes.) Loes.* | Washo | *Celastraceae* | T |
| 61 | *Embelia schimperi Vatke* | Gomoye | *Myrsinaceae* | L |
| 62 | *Erythrococca trichogyne (Muell Arg.) Prain* | Biccre kucco/ Gidigire | *Euphorbiaceae* | S |
| 64 | *Erythroxylum fischeri Engl.* | Gegin | [*Erythroxylaceae*](https://en.wikipedia.org/wiki/Erythroxylaceae) | T |
| 65 | *Euphorbia ampliphylla Pax* | Gachoo | *Euphorbiaceae* | T |
| 66 | *Fagaropsis angolensis (Engl.) Dale* | Didoye/Yaayyo | *Rutaceae* | T |
| 67 | *Ficus exasperate Vahl* | Kenchi/Dakey | *Moraceae* | T |
| 68 | *Ficus mucuso (Ficatho)* | Abe | [*Moraceae*](https://en.wikipedia.org/wiki/Moraceae) | T |
| 69 | *Ficus ovate Vahl* | Meregone/Kerewaye | *Moraceae* | T |
| 70 | *Ficus sur Forssk* | Semiyang/Eto/ | *Moraceae* | T |
| 71 | *Ficus thonningii Blume* | Semeti | *Moraceae* | T |
| 72 | *Ficus umbellata Vahl* | Songoboye | *Moraceae* | T |
| 73 | *Galiniera saxifraga (Hochst.) Bridson* | Dido | *Rubiaceae* | T |
| 74 | *Garcinia buchananii Baker* | Setole | *Hypericaceae* | T |
| 75 | *Goupia glabra Aubl.* | Medor | [*Goupiaceae*](https://en.wikipedia.org/wiki/Goupiaceae) | L |
| 76 | *Grewia mollis A. Juss.* | Goboye | *Tiliaceae* | T |
| 77 | *Hippocratea africana (Willd.) Loes.* | Soge | *Celasteraceae* | L |
| 78 | *Hippocratea goetzei Loes.* | Tero | *Celasteraceae* | L |
| 79 | *Hippocratea pallens Planch. ex Oliv.* | Qawe qombo | *Celastraceae* | L |
| 80 | *Ilex mitis (L.) Radlk.* | Qeto | *Aquifoliaceae* | T |
| 81 | *Impatiens sp.* | Tepacho | *Balsaminaceae* | H |
| 82 | *Jasminum abyssinicum Hochst. ex DC.* | Hawute qombo | *Oleaceae* | L |
| 83 | *Jasminum dichotomum Vahl.* | Kelite | *Oleaceae* | L |
| 84 | *Justicia schimperiana (Hochst. ex Nees)T. Anders* | Sharsharo | *Acanthaceae* | S |
| 85 | *Justicia sp.* | Topo | *Acanthaceae* | H |
| 86 | *Lagenaria siceraria* | Balsus | *Cucurbitaceae* | L |
| 87 | *Landolphia buchananii (Hall.f.) Stapf.* | Yame qombo/ Gelenshi | *Apocynaceae* | L |
| 88 | *Landolphia eminiana Hallier f.* | Chokopan | *Apocynaceae* | L |
| 89 | *Lannea welwitschii (Hiern) Engl.* | Zeme/Jeme | *Anacardiaceae* | T |
| 90 | *Lecaniodiscus fraxinifolius Bak.* | Mange | *Sapindaceae* | T |
| 91 | *Lepidotrichilia volkensii (Gurke) Leroy* | Shahiyo | *Meliaceae* | T |
| 92 | *Lepisnthes senegalensis (Juss.ex.poir) Leenh* | Eruye | *Sapotaceae* | T |
| 93 | *Leptaspis zeylanica Nees ex Steud.* | Boli | *Poaceae* | H |
| 94 | *Macaranga capensis (Baill.) Sim* | Shakkaro | *Euphorbiaceae* | T |
| 95 | *Maesa lanceolata Forssk.* | Caggo | *Myrsinaceae* | S |
| 96 | *Mallotus oppositifolius (Geisel) Mull* | Dasoye | *Euphorbiaceae* | T |
| 97 | *Manilkara butugi Chiov* | Goje | *Sapotaceae* | T |
| 98 | *Marantochloa leucantha (K. Schum.) Milne-Redh.* | Jigin | *Marantaceae* | H |
| 99 | *Margaritaria discoidea (Baill.) Webster* | Sanchore | *Euphorbiaceae* | T |
| 100 | *Maytenus gracilipes (Welw. ex Oliv.) Exell* | Shikko | *Celastraceae* | S |
| 101 | *Maytenus Undata (Thunb.)Blakelock* | Yeket | *Celastraceae* | L |
| 102 | *Millettia ferruginea (Hochst.) Bak.* | Yago/ Worege | *Fabaceae* | T |
| 103 | *Mimusops lanceolata A.DC* | Woni | *Sapotaceae* | T |
| 104 | *Morus mesozygia Stapf.* | Esek | *Moraceae* | T |
| 105 | *Olea capensis L.* | Sisi | *Oleaceae* | T |
| 106 | *Olea welwitschii (Knobl.) Gilg & Schellenb.* | Yaahoo | *Oleaceae* | T |
| 107 | *Oxyanthus speciosus DC* | Boyti/Opharo | *Rubiaceae* | S |
| 108 | *Paullinia pinnata L.* | Porab | *Sapindaceae* | L |
| 109 | *Pentas schimperiana (A. Rich.) Vatke* | Manchi buto | *Rubiaceae* | T |
| 110 | *Peponium vogelii (Hook.f) Engl.* | Daboye | *Cucurbitaceae* | L |
| 111 | *Phoenix reclinata Jacq.* | Yabbo | *Araliaceae* | T |
| 112 | *Phyllanthus reticulatus Poir.* | Lamon | *Euphorbiaceae* | S |
| 113 | *Physalis angulata* | Sensi | [*Solanaceae.*](https://en.wikipedia.org/wiki/Solanaceae) | S |
| 114 | *Phytolacca dodecandra L 'Herit.* | Denkey | *Phytolaccaceae* | L |
| 115 | *Pilea bambuseti Engl.* | Mechiato | *Urticaceae* | S |
| 116 | *Piper capense L.f* | Turto | *Piperaceae* | S |
| 117 | *Pittosporum viridiflorum Sims* | Ketewan/Sholloo | *Pittosporaceae* | S |
| 118 | *Plectranthus sp.* | Ongoku | *Lamiaceae* | S |
| 119 | *Pollia condensata C B. Clarke* | Rimbedho | *Commelinaceae* | H |
| 120 | *Polyscias fulva (Hiern) Harms* | KersheKeresho | *Araliaceae* | T |
| 121 | *Pouteria adolfi-friederici (Engl.) Baehni* | Qararo | *Sapotaceae* | T |
| 122 | *Pouteria alnifolia (Bak.) Roberty* | Sokoshi | *Sapotaceae* | T |
| 123 | *Pouteria altissima (A.Chev.) Baehni* | Gomuye | *Sapotaceae* | T |
| 124 | *Prunus africana (Hook.f.) Kalkm* | Omo | *Rosaceae* | T |
| 125 | *Pseuderanthemum tunicatum (Afzel.) Milne-Redh.* | Gurfie | *Acanthaceae* | L |
| 127 | *Psychotria orophila Petit* | Ayimoto | *Rubiaceae* | T |
| 128 | *Pycnostachys eminii Gurke,* | Amato | *Lamiaceae* | T |
| 129 | *Rinorea friisii M.Gilbert* | Gedeji | *Violaceae* | S |
| 130 | *Rinorea ilicifolia (Oliv.) Kuntze* | Kelgi | *Violaceae* | S |
| 131 | *Ritchiea albersii Gilg* | Erere | *Capparidaceae* | T |
| 132 | *Rothmannia urceliformis (Hiern) Robyns* | Bobokoye/Dibo | *Rubiaceae* | T |
| 133 | *Rubus apetalus Poir.* | Garoo | *Rosaceae* | L |
| 134 | *Saba comorensis (Boj) Pichon* | Ayime | *Apocynaceae* | L |
| 135 | *Schefflera abyssinica (Hochst. ex A. Rich.) Harms* | Manjo/getema | *Araliaceae* | T |
| 136 | *Schefflera myriantha (Bak) Drake* | Qero | *Araliaceae* | T |
| 137 | *Sericostachys Scandens Gilg &Lopr.* | Amuye | *Amaranthaceae* | L |
| 138 | *Setaria megaphylla (Steud.) Th Dur. & Schinz* | Elete | *Poaceae* | H |
| 139 | *Solanecio mannii (Hook. f) C. Jeffrey* | Eqibelo | *Asteraceae* | T |
| 140 | *Solanum nigrum L.* | Acho | *Solanaceae* | H |
| 141 | *Symphytum officinale* | Wonge | [*Boraginaceae*](https://en.wikipedia.org/wiki/Boraginaceae) | L |
| 142 | *Tacazzea apiculata Oliv* | Temuni | *Asclepiadaceae* | L |
| 143 | *Tacazzea conferta N.E. Br.* | Chino | *Asclepiadaceae* | L |
| 144 | *Teclea nobilis Del.* | Geltegni | *Rutaceae* | T |
| 145 | *Tiliacora funifera Oliv.* | Leketi | *Menispermaceae* | L |
| 146 | *Tiliacora troupinii Cuf.* | Sodhe/Gato | *Menispermaceae* | L |
| 147 | *Trema orientalis (L.) Bl.* | Ufo | *Ulmaceae* | T |
| 148 | *Trichilia prieuriana A.juss* | Gele | *Meliaceae* | T |
| 149 | *Trilepisium madagascariense DC* | Yeno | *Moraceae* | T |
| 150 | *Triumfetta tomentosa Boj.* | Mesho | *Tiliaceae* | T |
| 151 | *Uncaria africana G. Don* | Jange (Aniya) | *Rubiaceae* | L |
| 152 | *Urera hypselodendron (A. Rich.) Wedd.* | Imano | *Urticaceae* | H |
| 153 | *Vepris dainellii (Pic. Serm.) Kokwaro* | Mangirexxo | *Rutaceae* | T |
| 154 | *Vernonia amygdalina del* | Loresise/Grawo | *Asteraceae* | S |
| 155 | *Vernonia auriculifera Hiern* | Dangaretto | *Asteraceae* | S |
| 156 | *Vernonia bipotini Vatke* | Mergeto | *Asteraceae* | S |
| 157 | *Vernonia hochstetteri Sch.Bip.ex.Walp* | Elemasoye | *Asteraceae* | S |
| 158 | *Whitfieldia elongata (Beauv.) De Wild. & T. Dur* | Erikuye | *Acanthaceae* | S |

Note: Hab = Habitat, T = Tree, S = Shrub, H = Herb, and L = Liana.

**Appendix 2: Stand structure and IVI of species in all site of the MFBR**

| No | Species Local Name | Species Scientific Name | D | DO | Fr | RD | RDO | RFr | IVI (%) |
| --- | --- | --- | --- | --- | --- | --- | --- | --- | --- |
| 1 | Abe | *Ficus mucuso (Ficatho)* | 22.2 | 105.4 | 23.8 | 1.7 | 0.9 | 1.23 | 3.8 |
| 2 | Amato | *Pycnostachys eminii Gurke,* | 10.6 | 123.7 | 13.8 | 0.8 | 1.1 | 0.71 | 2.6 |
| 3 | Ayimoto | *Psychotria orophila Petit* | 5.6 | 105.4 | 3.8 | 0.4 | 0.9 | 0.19 | 1.6 |
| 4 | Beni | *Allophylus macrobotrys Gilg* | 6.3 | 193.2 | 8.8 | 0.5 | 1.7 | 0.45 | 2.6 |
| 5 | Bobokoye | *Rothmannia urceliformis (Hiern) Robyns* | 4.1 | 105.4 | 5.0 | 0.3 | 0.9 | 0.26 | 1.5 |
| 6 | Boqo/Boko | *Bersama abyssinica Fresen* | 3.1 | 114.0 | 5.0 | 0.2 | 1.0 | 0.26 | 1.5 |
| 7 | Boyti | *Oxyanthus speciosus DC* | 5.0 | 105.4 | 7.5 | 0.4 | 0.9 | 0.39 | 1.7 |
| 8 | Bunoo/kari | *Coffea arabica L.* | 6.6 | 123.7 | 7.5 | 0.5 | 1.1 | 0.39 | 2.0 |
| 9 | Caatto | *Albizia Schimperiana Oliv.* | 10.0 | 105.4 | 11.3 | 0.7 | 0.9 | 0.58 | 2.3 |
| 10 | Chato/sesa | *Albizia gummifera (J.F.Gmel.) C.A. Sm.* | 9.1 | 105.4 | 17.5 | 0.7 | 0.9 | 0.91 | 2.5 |
| 11 | Coqimato | *Dracaena afromontana Mildbr.* | 10.9 | 90.8 | 15.0 | 0.8 | 0.8 | 0.78 | 2.4 |
| 12 | Dampe/Dao/wanza | *Cordia Africana Lam.* | 15.0 | 57.5 | 35.0 | 1.1 | 0.5 | 1.82 | 3.4 |
| 13 | Dasoye | *Mallotus oppositifolius (Geisel) Mull* | 21.9 | 130.1 | 16.3 | 1.6 | 1.2 | 0.84 | 3.6 |
| 14 | Dibo | *Rothmannia urcelliformis (Hiern) Robyns* | 8.1 | 123.7 | 13.8 | 0.6 | 1.1 | 0.71 | 2.4 |
| 15 | Dido | *Galiniera saxifraga (Hochst.) Bridson* | 16.3 | 85.9 | 17.5 | 1.2 | 0.8 | 0.91 | 2.9 |
| 16 | Didoye | *Fagaropsis angolensis (Engl.) Dale* | 5.9 | 90.8 | 7.5 | 0.4 | 0.8 | 0.39 | 1.6 |
| 17 | Duwe | *Baphia abyssinica Brummit* | 48.8 | 55.0 | 33.8 | 3.6 | 0.5 | 1.75 | 5.9 |
| 18 | Ebi | *Dracaena steudneri Engl* | 9.1 | 85.9 | 12.5 | 0.7 | 0.8 | 0.65 | 2.1 |
| 19 | Elemasoye | *Vernonia hochstetteri Sch.Bip.ex.Walp* | 3.8 | 80.7 | 3.8 | 0.3 | 0.7 | 0.19 | 1.2 |
| 20 | Eqibelo | *Solanecio mannii (Hook. f) C. Jeffrey* | 7.5 | 130.1 | 8.8 | 0.6 | 1.2 | 0.45 | 2.2 |
| 21 | Erere | *Ritchiea albersii Gilg* | 24.4 | 76.1 | 32.5 | 1.8 | 0.7 | 1.69 | 4.2 |
| 22 | Eruye | *Lepisnthes senegalensis (Juss.ex.poir) Leenh* | 5.6 | 95.6 | 6.3 | 0.4 | 0.8 | 0.32 | 1.6 |
| 23 | Esek | *Morus mesozygia Stapf.* | 19.1 | 90.8 | 28.8 | 1.4 | 0.8 | 1.49 | 3.7 |
| 24 | Eto/shola | *Ficus sur Forssk.* | 5.9 | 59.0 | 10.0 | 0.4 | 0.5 | 0.52 | 1.5 |
| 25 | Gachoo | *Euphorbia ampliphylla Pax* | 5.3 | 179.2 | 10.0 | 0.4 | 1.6 | 0.52 | 2.5 |
| 26 | Gegin | *Erythroxylum fischeri Engl.* | 5.3 | 164.6 | 6.3 | 0.4 | 1.5 | 0.32 | 2.2 |
| 27 | Gele | *Trichilia prieuriana A.juss* | 25.6 | 79.1 | 25.0 | 1.9 | 0.7 | 1.30 | 3.9 |
| 28 | Geltegni | *Teclea nobilis Del.* | 10.6 | 112.2 | 17.5 | 0.8 | 1.0 | 0.91 | 2.7 |
| 29 | Gidi | *Croton macrostachyus Del.* | 5.0 | 123.7 | 6.3 | 0.4 | 1.1 | 0.32 | 1.8 |
| 30 | Goboye | *Grewia mollis A. Juss.* | 24.4 | 105.4 | 25.0 | 1.8 | 0.9 | 1.30 | 4.1 |
| 31 | Goje | *Manilkara butugi Chiov* | 9.4 | 105.4 | 12.5 | 0.7 | 0.9 | 0.65 | 2.3 |
| 32 | Gomuye | *Pouteria altissima (A.Chev.) Baehni* | 64.1 | 38.2 | 62.5 | 4.8 | 0.3 | 3.24 | 8.4 |
| 33 | Kenchi/Dakey | *Ficus exasperate Vahl* | 16.9 | 79.1 | 21.3 | 1.3 | 0.7 | 1.10 | 3.1 |
| 34 | Keresho | *Vernonia amygdalina Del.* | 8.8 | 136.6 | 18.8 | 0.7 | 1.2 | 0.97 | 2.8 |
| 35 | Kershe | *Polyscias fulva (Hiern) Harms* | 2.8 | 204.1 | 45.0 | 0.8 | 1.8 | 2.33 | 5.0 |
| 36 | Ketewan | *Pittosporum viriflorum Sims* | 4.1 | 252.4 | 10.0 | 0.3 | 2.2 | 0.52 | 3.1 |
| 37 | Keyang | *Blighia unijugata Bak.* | 45.6 | 44.7 | 40.0 | 0.2 | 7.8 | 0.19 | 8.2 |
| 38 | kobe | *Celtis zenkeri (A.Rich) wedd* | 81.3 | 34.9 | 65.0 | 6.1 | 0.3 | 3.37 | 9.8 |
| 39 | koke | *Celtis toka (Forssk. ) hepper.&.Wood* | 32.5 | 879.3 | 3.8 | 3.4 | 0.4 | 2.08 | 5.9 |
| 40 | Kuri | *Diospyros abyssinica (Hiern) F.White* | 31.6 | 71.8 | 31.3 | 2.4 | 0.6 | 1.62 | 4.6 |
| 41 | Loresise | *Vernonia amygdalina del* | 15.6 | 75.1 | 17.5 | 1.2 | 0.7 | 0.91 | 2.7 |
| 42 | Manchi buto | *Polyscias fulva (Hiern) Harms* | 4.7 | 133.6 | 18.8 | 0.4 | 1.2 | 0.97 | 2.5 |
| 43 | Mange | *Lecaniodiscus fraxinifolius Bak* | 59.4 | 55.0 | 38.8 | 4.4 | 0.5 | 2.01 | 6.9 |
| 44 | Mangirexxo | *Pentas schimperiana (A. Rich.) Vatke* | 7.8 | 128.7 | 10.0 | 0.6 | 1.1 | 0.52 | 2.2 |
| 45 | Manjo/getema | *Schefflera abyssinica (Hochst. ex A. Rich.) Harms* | 16.9 | 99.8 | 20.0 | 1.3 | 0.9 | 1.04 | 3.2 |
| 46 | Meregone/Kerewaye | *Ficus ovate Vahl* | 14.1 | 105.4 | 17.5 | 1.1 | 0.9 | 0.91 | 2.9 |
| 47 | Mergeto | *Vepris dainellii (Pic. Serm.) Kokwaro* | 10.9 | 160.4 | 43.8 | 0.8 | 1.4 | 2.27 | 4.5 |
| 48 | Mesho | *Vernonia auriculifera Hiern* | 11.3 | 178.0 | 45.0 | 0.8 | 1.6 | 2.33 | 4.8 |
| 49 | Omo/tekure enchete | *Triumfetta tomentosa Boj.* | 5.0 | 181.3 | 20.0 | 0.4 | 1.6 | 1.04 | 3.0 |
| 50 | Orero | *Prunus africana (Hook.f.) Kalkm* | 10.6 | 163.7 | 42.5 | 0.8 | 1.5 | 2.20 | 4.5 |
| 51 | Pishino | *Ekebergia capensis Sparrm* | 22.5 | 46.9 | 90.0 | 1.7 | 0.4 | 4.67 | 6.8 |
| 52 | Qararo | *Dracaena afromontana Mildbr.* | 11.3 | 68.7 | 41.3 | 2.4 | 0.6 | 2.14 | 5.2 |
| 53 | Qero | *Schefflera myriantha (Bak) Drake* | 11.3 | 239.1 | 45.0 | 0.8 | 2.1 | 2.33 | 5.3 |
| 54 | Qeto | *Pouteria adolfi-friederici (Engl.) Baehni* | 10.0 | 146.5 | 40.0 | 0.7 | 1.3 | 2.08 | 4.1 |
| 55 | Sanchore | *Margaritaria discoidea (Baill.) Webster* | 18.8 | 69.6 | 25.0 | 1.4 | 0.6 | 1.30 | 3.3 |
| 56 | Sati | *Albizia grandibracteata Taub* | 9.4 | 102.2 | 8.8 | 0.7 | 0.9 | 0.45 | 2.1 |
| 57 | Semberegn | *Combretum molle R. Br. ex G. Don* | 15.9 | 65.4 | 15.0 | 1.2 | 0.6 | 0.78 | 2.6 |
| 58 | Semeti | *Ficus thonningii Blume* | 3.1 | 65.4 | 5.0 | 0.2 | 0.6 | 0.26 | 1.1 |
| 59 | Semiyang | *Ficus sur Forssk* | 19.1 | 79.7 | 25.0 | 1.4 | 0.7 | 1.30 | 3.4 |
| 60 | Seso | *Ilex mitis (L.) Radlk.* | 5.0 | 135.6 | 20.0 | 0.4 | 1.2 | 1.04 | 2.6 |
| 61 | Setole | *Garcinia buchananii Baker* | 5.0 | 75.1 | 7.5 | 0.4 | 0.7 | 0.39 | 1.4 |
| 62 | Shahiyo | *Lepidotrichilia volkensii (Gurke) Leroy* | 3.8 | 170.5 | 15.0 | 0.3 | 1.5 | 0.78 | 2.6 |
| 63 | Shakkaro | *Macaranga capensis (Baill.) Sim* | 5.3 | 138.9 | 21.3 | 0.4 | 1.2 | 1.10 | 2.7 |
| 64 | Shao | *Allophylus abyssinicus (Hochst.) Radlk.* | 11.3 | 54.6 | 45.0 | 0.8 | 0.5 | 2.33 | 3.7 |
| 65 | Shito | *Bothriocline schimperi Olivo & Hiern ex Benth.* | 7.2 | 156.3 | 28.8 | 0.5 | 1.4 | 1.49 | 3.4 |
| 66 | Shotele | *Leptaspis zeylanica Nees ex Steud.* | 22.8 | 141.9 | 30.0 | 1.7 | 1.3 | 1.56 | 4.5 |
| 67 | Shoto | *Alangium chinense (Lour.) Harms* | 10.3 | 136.0 | 41.3 | 0.8 | 1.2 | 2.14 | 4.1 |
| 68 | Shukushi | *Alangium chinense (Lour.) Harms* | 5.0 | 75.1 | 6.3 | 0.4 | 0.7 | 0.32 | 1.4 |
| 69 | Sinsino | *Cyathea manniana Hook* | 24.1 | 49.8 | 25.0 | 1.8 | 0.4 | 1.30 | 3.5 |
| 70 | Sisi | *Olea capensis L.* | 7.5 | 130.1 | 11.3 | 0.6 | 1.2 | 0.58 | 2.3 |
| 71 | Sokoshi | *Pouteria alnifolia (Bak.) Roberty* | 32.5 | 65.4 | 32.5 | 2.4 | 0.6 | 1.69 | 4.7 |
| 72 | Somoye/Shomo/besana | *Croton sylvaticus Krauss* | 10.6 | 74.6 | 13.8 | 0.8 | 0.7 | 0.71 | 2.2 |
| 73 | Songoboye | *Ficus exasperata Vahl* | 6.3 | 69.9 | 5.0 | 0.5 | 0.6 | 0.26 | 1.3 |
| 74 | Tengi | *Antiaris toxicaria Resch* | 48.4 | 55.0 | 41.3 | 3.6 | 0.5 | 2.14 | 6.2 |
| 75 | Tokun | *Apodytes dimidiata E. Mey. ex Arn.* | 8.1 | 105.4 | 10.0 | 0.6 | 0.9 | 0.52 | 2.1 |
| 76 | Ufo | *Trema orientalis (L.) Bl.* | 4.4 | 138.9 | 8.8 | 0.3 | 1.2 | 0.45 | 2.0 |
| 77 | Upuye | *Celtis africana Burm.f.* | 9.7 | 116.7 | 12.5 | 0.7 | 1.0 | 0.65 | 2.4 |
| 78 | Usume | *Buddleja polystachya Fresen.* | 6.3 | 116.7 | 7.5 | 0.5 | 1.0 | 0.39 | 1.9 |
| 79 | Wagaamo | *Ehretia cymosa Thonn.* | 7.5 | 138.9 | 13.8 | 0.6 | 1.2 | 0.71 | 2.5 |
| 80 | Washo | *Elaeodendron buchananii (Loes.) Loes.* | 10.0 | 139.7 | 15.0 | 0.7 | 1.2 | 0.78 | 2.8 |
| 81 | Weralo | *Cassipourea malosana (Baker) Alston* | 10.3 | 162.5 | 8.8 | 0.8 | 1.4 | 0.45 | 2.7 |
| 82 | Woleloye | *Dombeya torrida (J.F.Gmel.) P. Bamps* | 4.7 | 116.7 | 6.3 | 0.4 | 1.0 | 0.32 | 1.7 |
| 83 | Woni | *Mimusops lanceolata A.DC* | 14.1 | 55.9 | 17.5 | 1.1 | 0.5 | 0.91 | 2.5 |
| 84 | Worango | *Flacourtia indica (Burm.f.) Merrill* | 11.3 | 135.7 | 16.3 | 0.8 | 1.2 | 0.84 | 2.9 |
| 85 | Worege | *Millettia ferruginea (Hochst.) Baker* | 10.9 | 158.5 | 12.5 | 0.8 | 1.4 | 0.65 | 2.9 |
| 86 | Xixiribbo | *Canthium oligocarpum Hiern* | 6.3 | 181.3 | 11.3 | 0.5 | 1.6 | 0.58 | 2.7 |
| 87 | Yaahoo | *Phoenix reclinata Jacq.* | 8.1 | 142.8 | 15.0 | 0.6 | 1.3 | 0.78 | 2.7 |
| 88 | Yaayyo | *Olea welwitschii (Knobl.) Gilg & Schellenb.* | 7.8 | 147.1 | 12.5 | 0.6 | 1.3 | 0.65 | 2.5 |
| 89 | Yabbo | *Fagaropsis angolensis (Engl.) Dale* | 4.7 | 146.8 | 6.3 | 0.4 | 1.3 | 0.32 | 2.0 |
| 90 | Yago/berebere | *Millettia ferruginea (Hochst.) Bak.* | 4.7 | 179.0 | 7.5 | 0.4 | 1.6 | 0.39 | 2.3 |
| 91 | Yeno | *Trilepisium madagascariense DC* | 17.8 | 56.4 | 16.3 | 1.3 | 0.5 | 0.84 | 2.7 |
| 92 | Yuddo | *Dracaena steudneri Engler* | 8.8 | 146.5 | 13.8 | 0.7 | 1.3 | 0.71 | 2.7 |
| 93 | Yuye | *Deinbollia Kilimandschrica Taub* | 14.4 | 65.4 | 21.3 | 1.1 | 0.6 | 1.10 | 2.8 |
| 94 | Zeme/Jeme | *Lannea welwitschii (Hiern) Engl.* | 28.8 | 55.0 | 37.5 | 2.1 | 0.5 | 1.95 | 4.6 |
|  |  |  | **1338.8** | **11248.1** | **1927.5** | **100.0** | **100.0** | **100.00** | **300.0** |

**Appendix 3: Stand structure and IVI of species in site I of the MFBR**

| No | Species Local Name | Species Scientific Name | D | DO | Fr | RD | RDO | RFr | IVI |
| --- | --- | --- | --- | --- | --- | --- | --- | --- | --- |
| 1 | Abe | *Ficus mucuso (Ficatho)* | 31.25 | 24.4 | 50 | 2.1 | 0.77 | 2.9 | 5.82 |
| 2 | Beni | *Allophylus macrobotrys Gilg* | 5 | 141.1 | 20 | 0.3 | 4.43 | 1.2 | 5.94 |
| 3 | Boyti | *Oxyanthus speciosus DC* | 10 | 74.8 | 25 | 0.7 | 2.35 | 1.5 | 4.49 |
| 4 | Dampe | *Cordia Africana Lam.* | 22.5 | 24.4 | 40 | 1.5 | 0.77 | 2.4 | 4.64 |
| 5 | Dasoye | *Mallotus oppositifolius (Geisel) Mull* | 48.75 | 44.4 | 35 | 3.3 | 1.39 | 2.1 | 6.75 |
| 6 | Didoye | *Fagaropsis angolensis (Engl.) Dale* | 3.75 | 182.4 | 15 | 0.3 | 5.72 | 0.9 | 6.86 |
| 7 | Duwe | *Baphia abyssinica Brummit* | 80 | 21.2 | 60 | 5.4 | 0.66 | 3.5 | 9.61 |
| 8 | Ebi | *Dracaena steudneri Engl* | 3.75 | 180.9 | 10 | 0.3 | 5.67 | 0.6 | 6.52 |
| 9 | Elemasoye | *Vernonia hochstetteri Sch.Bip.ex.Walp* | 11.25 | 99.9 | 15 | 0.8 | 3.13 | 0.9 | 4.78 |
| 10 | Erere | Ritchiea albersii Gilg | 21.25 | 51.8 | 35 | 1.4 | 1.62 | 2.1 | 5.12 |
| 11 | Eruye | Lepisnthes senegalensis (Juss.ex.poir) Leenh | 8.75 | 116.6 | 20 | 0.6 | 3.66 | 1.2 | 5.43 |
| 12 | Esek | Morus mesozygia Stapf. | 22.5 | 63.9 | 35 | 1.5 | 2.00 | 2.1 | 5.59 |
| 13 | Gegin | *Erythroxylum fischeri Engl.* | 28.75 | 64.5 | 35 | 1.9 | 2.02 | 2.1 | 6.03 |
| 14 | Gele | Trichilia prieuriana A.juss | 53.75 | 41.3 | 45 | 3.6 | 1.29 | 2.6 | 7.58 |
| 15 | Geltegni | *Teclea nobilis Del.* | 30 | 41.3 | 50 | 2.0 | 1.29 | 2.9 | 6.27 |
| 16 | Gidi | Croton macrostachyus Del. | 25 | 34.1 | 30 | 1.7 | 1.07 | 1.8 | 4.53 |
| 17 | Goboye | *Grewia mollis A. Juss.* | 36.25 | 47.9 | 40 | 2.5 | 1.50 | 2.4 | 6.31 |
| 18 | Goje | Manilkara butugi Chiov | 33.75 | 34.1 | 45 | 2.3 | 1.07 | 2.6 | 6.00 |
| 19 | Gomuye | *Pouteria altissima (A.Chev.) Baehni* | 77.5 | 25.0 | 70 | 5.2 | 0.78 | 4.1 | 10.15 |
| 20 | Kari | Coffea arabica L. | 10 | 79.1 | 20 | 0.7 | 2.48 | 1.2 | 4.33 |
| 21 | Kenchi/Dakey | *Ficus exasperate Vahl* | 33.75 | 44.4 | 45 | 2.3 | 1.39 | 2.6 | 6.32 |
| 22 | Ketewan | *Pittosporum viriflorum Sims* | 13.75 | 136.4 | 35 | 0.9 | 4.28 | 2.1 | 7.27 |
| 23 | Keyang | Blighia unijugata Bak. | 115 | 32.6 | 90 | 7.8 | 1.02 | 5.3 | 14.10 |
| 24 | kobe | *Celtis zenkeri (A.Rich) wedd* | 93.75 | 18.9 | 95 | 6.3 | 0.59 | 5.6 | 12.53 |
| 25 | koke | *Celtis toka (Forssk. ) hepper.&.Wood* | 42.5 | 20.6 | 45 | 2.9 | 0.65 | 2.6 | 6.17 |
| 26 | Kuri | *Diospyros abyssinica (Hiern) F.White* | 42.5 | 23.9 | 55 | 2.9 | 0.75 | 3.2 | 6.86 |
| 27 | Loresise | *Vernonia amygdalina del* | 3.75 | 86.4 | 15 | 0.3 | 2.71 | 0.9 | 3.85 |
| 28 | Mange | *Lecaniodiscus fraxinifolius Bak.* | 58.75 | 25.0 | 35 | 4.0 | 0.78 | 2.1 | 6.82 |
| 29 | Sanchore | *Margaritaria discoidea (Baill.) Webster* | 48.75 | 41.3 | 65 | 3.3 | 1.29 | 3.8 | 8.42 |
| 30 | Semberegn | *Combretum molle R. Br. ex G. Don* | 53.75 | 29.7 | 50 | 3.6 | 0.93 | 2.9 | 7.51 |
| 31 | Semeti | *Ficus thonningii Blume* | 20 | 47.9 | 30 | 1.4 | 1.50 | 1.8 | 4.62 |
| 32 | Semiyang | *Ficus sur Forssk* | 6.25 | 147.3 | 10 | 0.4 | 4.62 | 0.6 | 5.63 |
| 33 | Setole | *Garcinia buchananii Baker* | 26.25 | 47.9 | 40 | 1.8 | 1.50 | 2.4 | 5.63 |
| 34 | Shotele | *Leptaspis zeylanica Nees ex Steud.* | 7.5 | 50.9 | 10 | 0.5 | 1.60 | 0.6 | 2.69 |
| 35 | Shukushi | *Alangium chinense (Lour.) Harms* | 31.25 |  | 40 | 2.1 | 0.00 | 2.4 | 4.47 |
| 36 | Sisi | *Olea capensis L.* | 0 | 41.3 | 0 | 0.0 | 1.29 | 0.0 | 1.29 |
| 37 | Sokoshi | *Pouteria alnifolia (Bak.) Roberty* | 71.25 | 97.7 | 75 | 4.8 | 3.06 | 4.4 | 12.3 |
| 38 | Somoye | *Croton sylvaticus Krauss* | 8.75 | 47.9 | 15 | 0.6 | 1.50 | 0.9 | 2.98 |
| 39 | Songoboye | *Ficus exasperata Vahl* | 25 | 112.0 | 35 | 1.7 | 3.51 | 2.1 | 7.26 |
| 40 | Tengi | *Antiaris toxicaria Resch* | 57.5 | 34.1 | 45 | 3.9 | 1.07 | 2.6 | 7.61 |
| 41 | Tokun | *Apodytes dimidiata E. Mey. ex Arn.* | 3.75 | 176.9 | 5 | 0.3 | 5.55 | 0.3 | 6.10 |
| 42 | Upuye | *Celtis africana Burm.f.* | 22.5 | 66.8 | 30 | 1.5 | 2.10 | 1.8 | 5.38 |
| 43 | Usume | *Buddleja polystachya Fresen.* | 12.5 | 80.9 | 15 | 0.8 | 2.54 | 0.9 | 4.27 |
| 44 | Woni | Mimusops lanceolata A.DC | 37.5 | 41.3 | 50 | 2.5 | 1.29 | 2.9 | 6.77 |
| 45 | Worege | *Millettia ferruginea (Hochst.) Baker* | 25 | 128.0 | 25 | 1.7 | 4.01 | 1.5 | 7.18 |
| 46 | Yuye | *Deinbollia Kilimandschrica Taub* | 5 | 167.1 | 5 | 0.3 | 5.24 | 0.3 | 5.87 |
| 47 | Zeme/Jeme | *Lannea welwitschii (Hiern) Engl.* | 47.5 | 47.9 | 45 | 3.2 | 1.50 | 2.6 | 7.36 |
| **Total** | |  | **1477.5** | **3187.5** | **1700** | **100.0** | **100.00** | **100.0** | **300.00** |

**Appendix 4: Stand structure and IVI of species in site II of the MFBR**

| No | Species Local Name | *Species Scientific Name* | D | DO | Fr | RD | RDO | RFr | IVI (%) |
| --- | --- | --- | --- | --- | --- | --- | --- | --- | --- |
| 1 | Abe | *Ficus mucuso (Ficatho)* | 42 | 28.1 | 44 | 3.4 | 0.65 | 3.2 | 7.3 |
| 2 | Beni | *Allophylus macrobotrys Gilg* | 20 | 59.9 | 28 | 1.6 | 2.87 | 2.0 | 6.5 |
| 3 | Bobokoye | *Rothmannia urceliformis (Hiern) Robyns* | 13 | 65.6 | 16 | 1.1 | 2.09 | 1.2 | 4.3 |
| 4 | Boyti | *Oxyanthus speciosus DC* | 16 | 67.2 | 24 | 1.3 | 3.30 | 1.7 | 6.3 |
| 5 | Dampe | *Cordia Africana Lam.* | 59 | 14.6 | 60 | 4.8 | 2.61 | 4.4 | 11.8 |
| 6 | Dasoye | *Mallotus oppositifolius (Geisel) Mull* | 13 | 75.3 | 12 | 1.1 | 2.96 | 0.9 | 4.9 |
| 7 | Didoye | *Fagaropsis angolensis (Engl.) Dale* | 19 | 50.4 | 24 | 1.5 | 2.81 | 1.7 | 6.1 |
| 8 | Duwe | *Baphia abyssinica Brummit* | 69 | 18.2 | 48 | 5.6 | 2.90 | 3.5 | 12.0 |
| 9 | Ebi | *Dracaena steudneri Engl* | 15 | 62.0 | 24 | 1.2 | 4.25 | 1.7 | 7.2 |
| 10 | Erere | *Ritchiea albersii Gilg* | 42 | 55.9 | 56 | 3.4 | 3.43 | 4.1 | 10.9 |
| 11 | Esek | *Morus mesozygia Stapf.* | 12 | 55.3 | 24 | 1.0 | 4.84 | 1.7 | 7.6 |
| 12 | Gele | *Trichilia prieuriana A.juss* | 28 | 22.5 | 32 | 2.3 | 2.14 | 2.3 | 6.7 |
| 13 | Geltegni | *Teclea nobilis Del.* | 2 | 118.4 | 4 | 0.2 | 1.31 | 0.3 | 1.8 |
| 14 | Goboye | *Grewia mollis A. Juss.* | 32 | 24.0 | 36 | 2.6 | 2.00 | 2.6 | 7.2 |
| 15 | Gomuye | *Pouteria altissima (A.Chev.) Baehni* | 102 | 14.0 | 98 | 8.3 | 3.07 | 7.3 | 18.6 |
| 16 | Kenchi/Dakey | *Ficus exasperate Vahl* | 37 | 42.1 | 44 | 3.0 | 5.28 | 3.2 | 11.5 |
| 17 | Kershe | *Polyscias fulva (Hiern) Harms* | 9 | 141.1 | 12 | 0.7 | 0.68 | 0.9 | 2.3 |
| 18 | Ketewan | *Pittosporum viriflorum Sims* | 4 | 1100.5 | 8 | 0.3 | 2.80 | 0.6 | 3.7 |
| 19 | Keyang | *Blighia unijugata Bak.* | 31 | 21.0 | 36 | 2.5 | 2.14 | 2.6 | 7.3 |
| 20 | kobe | *Celtis zenkeri (A.Rich) wedd* | 87 | 18.1 | 84 | 7.1 | 3.14 | 6.1 | 16.3 |
| 21 | koke | *Celtis toka (Forssk. ) hepper.&.Wood* | 29 | 42.8 | 48 | 2.4 | 5.14 | 3.5 | 11.0 |
| 22 | Kuri | *Diospyros abyssinica (Hiern) F.White* | 14 | 45.9 | 12 | 1.1 | 2.97 | 0.9 | 5.0 |
| 23 | Loresise | *Vernonia amygdalina del* | 26 | 47.0 | 36 | 2.1 | 0.97 | 2.6 | 5.7 |
| 24 | Mange | *Lecaniodiscus fraxinifolius Bak.* | 100 | 20.8 | 64 | 8.1 | 3.52 | 4.7 | 16.3 |
| 25 | Meregone/Kerewaye | *Ficus ovate Vahl* | 28 | 61.3 | 36 | 2.3 | 2.20 | 2.6 | 7.1 |
| 26 | Sanchore | *Margaritaria discoidea (Baill.) Webster* | 14 | 45.9 | 24 | 1.1 | 1.18 | 1.7 | 4.1 |
| 27 | Sati | *Albizia grandibracteata Taub* | 25 | 705.5 | 24 | 2.0 | 2.66 | 1.7 | 6.4 |
| 28 | Semberegn | *Combretum molle R. Br. ex G. Don* | 13 | 60.0 | 16 | 1.1 | 2.36 | 1.2 | 4.6 |
| 29 | Semiyang | *Ficus sur Forssk* | 41 | 47.0 | 56 | 3.3 | 1.12 | 4.1 | 8.5 |
| 30 | Sisi | *Olea capensis L.* | 18 | 91.0 | 24 | 1.5 | 2.93 | 1.7 | 6.1 |
| 31 | Sokoshi | *Pouteria alnifolia (Bak.) Roberty* | 45 | 57.0 | 40 | 3.7 | 1.97 | 2.9 | 8.5 |
| 32 | Somoye | *Croton sylvaticus Krauss* | 20 | 44.8 | 20 | 1.6 | 4.67 | 1.5 | 7.8 |
| 33 | Songoboye | *Ficus exasperata Vahl* | 22 | 63.4 | 28 | 1.8 | 2.20 | 2.0 | 6.0 |
| 34 | Tengi | *Antiaris toxicaria Resch* | 61 | 25.3 | 56 | 5.0 | 2.59 | 4.1 | 11.6 |
| 35 | Tokun | *Apodytes dimidiata E. Mey. ex Arn.* | 13 | 627.1 | 16 | 1.1 | 1.22 | 1.2 | 3.4 |
| 36 | Usume | *Buddleja polystachya Fresen.* | 3 | 360.8 | 4 | 0.2 | 0.85 | 0.3 | 1.4 |
| 37 | Woleloye | *Dombeya torrida (J.F.Gmel.) P. Bamps* | 3 | 365.3 | 4 | 0.2 | 2.36 | 0.3 | 2.9 |
| 38 | Woni | *Mimusops lanceolata A.DC* | 11 | 26.1 | 12 | 0.9 | 0.94 | 0.9 | 2.7 |
| 39 | Worege | *Millettia ferruginea (Hochst.) Baker* | 22 | 63.5 | 28 | 1.8 | 0.85 | 2.0 | 4.7 |
| 40 | Yuye | *Deinbollia Kilimandschrica Taub* | 29 | 50.4 | 44 | 2.4 | 0.98 | 3.2 | 6.5 |
| 41 | Zeme/Jeme | *Lannea welwitschii (Hiern) Engl.* | 43 | 20.0 | 68 | 3.5 | 1.05 | 4.9 | 9.5 |
| **Total** | |  | **1232** | **4925.2** |  | **100.0** | **100.00** | **100.0** | **300.0** |

**Appendix 5: Stand structure and IVI of species in site III of the MFBR**

| No | Species Local Name | Species Scientific Name | D | DO | Fr | RD | RDO | RFr | IVI |
| --- | --- | --- | --- | --- | --- | --- | --- | --- | --- |
| 1 | Abe | *Ficus mucuso (Ficatho)* | 23 | 49.37 | 20 | 1.7 | 2.59 | 1.6 | 5.9 |
| 2 | Dampe | *Cordia Africana Lam.* | 57 | 17.40 | 24 | 4.3 | 0.91 | 1.9 | 7.1 |
| 3 | Dasoye | *Mallotus oppositifolius (Geisel) Mull* | 30 | 73.07 | 24 | 2.3 | 3.83 | 1.9 | 8.0 |
| 4 | Duwe | *Baphia abyssinica Brummit* | 46 | 21.32 | 28 | 3.5 | 1.12 | 2.2 | 6.8 |
| 5 | Ebi | *Dracaena steudneri Engl* | 17 | 60.22 | 24 | 1.3 | 3.15 | 1.9 | 6.3 |
| 6 | Elemasoye | *Vernonia hochstetteri Sch.Bip.ex.Walp* | 16 | 54.26 | 16 | 1.2 | 2.84 | 1.2 | 5.3 |
| 7 | Erere | *Ritchiea albersii Gilg* | 28 | 54.26 | 40 | 2.1 | 2.84 | 3.1 | 8.1 |
| 8 | Eruye | *Lepisnthes senegalensis (Juss.ex.poir) Leenh* | 21 | 63.72 | 24 | 1.6 | 3.34 | 1.9 | 6.8 |
| 9 | Esek | *Morus mesozygia Stapf.* | 53 | 53.73 | 68 | 4.0 | 2.81 | 5.3 | 12.1 |
| 10 | Gele | *Trichilia prieuriana A.juss* | 25 | 40.29 | 28 | 1.9 | 2.11 | 2.2 | 6.2 |
| 11 | Geltegni | *Teclea nobilis Del.* | 18 | 157.61 | 32 | 1.4 | 8.26 | 2.5 | 12.1 |
| 12 | Goboye | *Grewia mollis A. Juss.* | 33 | 26.73 | 32 | 2.5 | 1.40 | 2.5 | 6.4 |
| 13 | Goje | *Manilkara butugi Chiov* | 15 | 31.31 | 20 | 1.1 | 1.64 | 1.6 | 4.3 |
| 14 | Gomuye | *Pouteria altissima (A.Chev.) Baehni* | 81 | 14.93 | 76 | 6.1 | 0.78 | 5.9 | 12.8 |
| 15 | Keyang | *Blighia unijugata Bak.* | 57 | 21.16 | 56 | 4.3 | 1.11 | 4.4 | 9.8 |
| 16 | kobe | *Celtis zenkeri (A.Rich) wedd* | 141 | 14.09 | 88 | 10.7 | 0.74 | 6.9 | 18.3 |
| 17 | koke | *Celtis toka (Forssk. ) hepper.&.Wood* | 60 | 24.68 | 68 | 4.6 | 1.29 | 5.3 | 11.1 |
| 18 | Kuri | *Diospyros abyssinica (Hiern) F.White* | 86 | 24.57 | 72 | 6.5 | 1.29 | 5.6 | 13.4 |
| 19 | Loresise | *Vernonia amygdalina del* | 31 | 45.67 | 28 | 2.4 | 2.39 | 2.2 | 6.9 |
| 20 | Mange | *Lecaniodiscus fraxinifolius Bak.* | 81 | 20.22 | 60 | 6.1 | 1.06 | 4.7 | 11.9 |
| 21 | Meregone/Kerewaye | *Ficus ovate Vahl* | 24 | 59.57 | 28 | 1.8 | 3.12 | 2.2 | 7.1 |
| 22 | Sanchore | *Margaritaria discoidea (Baill.) Webster* | 16 | 44.55 | 16 | 1.2 | 2.33 | 1.2 | 4.8 |
| 23 | Sati | *Albizia grandibracteata Taub* | 5 | 68.50 | 4 | 0.4 | 3.59 | 0.3 | 4.3 |
| 24 | Semberegn | *Combretum molle R. Br. ex G. Don* | 10 | 58.30 | 8 | 0.8 | 3.05 | 0.6 | 4.4 |
| 25 | Semiyang | *Ficus sur Forssk* | 27 | 60.89 | 36 | 2.0 | 3.19 | 2.8 | 8.0 |
| 26 | Shotele | *Leptaspis zeylanica Nees ex Steud.* | 24 | 88.39 | 20 | 0.9 | 4.63 | 1.6 | 7.1 |
| 27 | Sisi | *Olea capensis L.* | 12 | 69.37 | 32 | 2.0 | 3.63 | 2.5 | 8.2 |
| 28 | Sokoshi | *Pouteria alnifolia (Bak.) Roberty* | 27 | 51.70 | 28 | 2.0 | 2.71 | 2.2 | 6.9 |
| 29 | Somoye | *Croton sylvaticus Krauss* | 26 | 61.57 | 24 | 1.8 | 3.23 | 1.9 | 6.9 |
| 30 | Tengi | *Antiaris toxicaria Resch* | 88 | 16.97 | 72 | 6.7 | 0.89 | 5.6 | 13.2 |
| 31 | Tokun | *Apodytes dimidiata E. Mey. ex Arn.* | 16 | 60.89 | 20 | 1.2 | 3.19 | 1.6 | 6.0 |
| 32 | Upuye | *Celtis africana Burm.f.* | 23 | 67.65 | 28 | 1.7 | 3.54 | 2.2 | 7.5 |
| 33 | Usume | *Buddleja polystachya Fresen.* | 21 | 97.12 | 24 | 1.6 | 5.09 | 1.9 | 8.6 |
| 34 | Woleloye | *Dombeya torrida (J.F.Gmel.) P. Bamps* | 15 | 100.53 | 24 | 1.1 | 5.27 | 1.9 | 8.3 |
| 35 | Woni | *Mimusops lanceolata A.DC* | 13 | 25.37 | 16 | 1.0 | 1.33 | 1.2 | 3.6 |
| 36 | Yuye | *Deinbollia Kilimandschrica Taub* | 19 | 48.93 | 32 | 1.4 | 2.56 | 2.5 | 6.5 |
| 37 | Zeme/Jeme | *Lannea welwitschii (Hiern) Engl.* | 33 | 59.85 | 44 | 2.5 | 3.14 | 3.4 | 9.0 |
| **Total** | |  | **1232** | **1908.75** | **1284** | **100.0** | **100.00** | **100.0** | **300.0** |

**Appendix 6: Stand structure and IVI of species in site IV of the MFBR**

| No | Species Local Name | **Species Scientific Name** | D | Do | Fr | R.D | R.Do | R.Fr | IVI |
| --- | --- | --- | --- | --- | --- | --- | --- | --- | --- |
| 1 | Amato | *Pycnostachys eminii Gurke,* | 42.5 | 41.5 | 55 | 1.6 | 1.7 | 2.2 | 5.5 |
| 2 | Ayimoto | *Psychotria orophila Petit* | 22.5 | 61.2 | 15 | 0.8 | 2.6 | 0.6 | 4.0 |
| 3 | Boqo/Boko | *Bersama abyssinica Fresen* | 12.5 | 101.2 | 30 | 0.6 | 4.2 | 1.2 | 6.1 |
| 4 | Bunoo | *Coffea arabica L.* | 18.8 | 120.0 | 20 | 0.7 | 5.0 | 0.8 | 6.5 |
| 5 | Caatto | *Albizia Schimperiana Oliv.* | 40.0 | 46.9 | 45 | 1.5 | 2.0 | 1.8 | 5.3 |
| 6 | Chato/sesa | *Albizia gummifera (J.F.Gmel.) C.A. Sm.* | 36.3 | 38.0 | 70 | 1.3 | 1.6 | 2.8 | 5.8 |
| 7 | Coqimato | *Dracaena afromontana Mildbr.* | 43.8 | 38.0 | 60 | 1.6 | 1.6 | 2.4 | 5.6 |
| 8 | Dao/wanza | *Alangium chinense (Lour.) Harms* | 20.0 | 22.0 | 45 | 2.0 | 0.9 | 1.8 | 4.7 |
| 9 | Dibo | *Rothmannia urcelliformis (Hiern) Robyns* | 32.5 | 38.0 | 55 | 1.2 | 1.6 | 2.2 | 5.1 |
| 10 | Dido | *Galiniera saxifraga (Hochst.) Bridson* | 35.0 | 53.3 | 75 | 2.5 | 2.2 | 3.0 | 7.8 |
| 11 | Eqibelo | *Solanecio mannii (Hook. f) C. Jeffrey* | 30.0 | 46.9 | 35 | 1.1 | 2.0 | 1.4 | 4.5 |
| 12 | Eto/shola | *Ficus sur Forssk.* | 23.8 | 23.4 | 40 | 0.9 | 1.0 | 1.6 | 3.5 |
| 13 | Gachoo | *Euphorbia ampliphylla Pax* | 21.3 | 46.9 | 40 | 0.8 | 2.0 | 1.6 | 4.4 |
| 14 | Keresho | *Vernonia amygdalina Del.* | 65.0 | 22.7 | 70 | 3.9 | 1.0 | 2.8 | 7.7 |
| 15 | Manchi buto | *Polyscias fulva (Hiern) Harms* | 18.8 | 61.2 | 25 | 0.7 | 2.6 | 1.0 | 4.3 |
| 16 | Mangirexxo | *Pentas schimperiana (A. Rich.) Vatke* | 31.3 | 37.0 | 85 | 1.2 | 1.6 | 3.4 | 6.1 |
| 17 | Manjo/getema | *Schefflera abyssinica (Hochst. ex A. Rich.) Harms* | 67.5 | 59.3 | 40 | 4.4 | 2.5 | 1.6 | 8.5 |
| 18 | Mergeto | *Vepris dainellii (Pic. Serm.) Kokwaro* | 43.8 | 61.2 | 85 | 2.7 | 2.6 | 3.4 | 8.7 |
| 19 | Mesho | *Vernonia auriculifera Hiern* | 45.0 | 53.3 | 60 | 2.2 | 2.2 | 2.4 | 6.9 |
| 20 | Omo/tekure enchete | *Triumfetta tomentosa Boj.* | 20.0 | 57.5 | 65 | 2.3 | 2.4 | 2.6 | 7.3 |
| 21 | Orero | *Prunus africana (Hook.f.) Kalkm* | 42.5 | 52.6 | 70 | 1.9 | 2.2 | 2.8 | 7.0 |
| 22 | Pishino | *Ekebergia capensis Sparrm* | 90.0 | 19.2 | 98 | 10.5 | 0.8 | 4.0 | 15.3 |
| 23 | Qararo | *Dracaena afromontana Mildbr.* | 45.0 | 97.2 | 80 | 2.2 | 4.1 | 3.2 | 9.5 |
| 24 | Qero | *Schefflera myriantha (Bak) Drake* | 45.0 | 77.5 | 60 | 2.7 | 3.3 | 2.4 | 8.4 |
| 25 | Qeto | *Pouteria adolfi-friederici (Engl.) Baehni* | 40.0 | 46.9 | 80 | 2.6 | 2.0 | 3.2 | 7.8 |
| 26 | Seso | *Ilex mitis (L.) Radlk.* | 20.0 | 53.3 | 65 | 2.2 | 2.2 | 2.6 | 7.0 |
| 27 | Shahiyo | *Lepidotrichilia volkensii (Gurke) Leroy* | 15.0 | 74.8 | 35 | 0.6 | 3.1 | 1.4 | 5.1 |
| 28 | Shakkaro | *Macaranga capensis (Baill.) Sim* | 21.3 | 61.2 | 25 | 0.8 | 2.6 | 1.0 | 4.4 |
| 29 | Shao | *Allophylus abyssinicus (Hochst.) Radlk.* | 45.0 | 24.8 | 80 | 5.5 | 1.0 | 3.2 | 9.7 |
| 30 | Shito | *Bothriocline schimperi Olivo & Hiern ex Benth.* | 28.8 | 53.3 | 55 | 3.0 | 2.2 | 2.2 | 7.4 |
| 31 | Shomo/besana | *Croton macrostachyus Del.* | 30.0 | 59.3 | 65 | 1.1 | 2.5 | 2.6 | 6.2 |
| 32 | Shoto | *Alangium chinense (Lour.) Harms* | 41.3 | 46.9 | 65 | 2.7 | 2.0 | 2.6 | 7.3 |
| 33 | Sinsino | *Cyathea manniana Hook* | 96.3 | 27.2 | 98 | 11.2 | 1.1 | 4.0 | 16.3 |
| 34 | Ufo | *Trema orientalis (L.) Bl.* | 17.5 | 57.5 | 35 | 0.6 | 2.4 | 1.4 | 4.5 |
| 35 | Wagaamo | *Ehretia cymosa Thonn.* | 30.0 | 53.3 | 55 | 1.1 | 2.2 | 2.2 | 5.6 |
| 36 | Washo | *Elaeodendron buchananii (Loes.) Loes.* | 40.0 | 53.3 | 60 | 1.5 | 2.2 | 2.4 | 6.1 |
| 37 | Weralo | *Cassipourea malosana (Baker) Alston* | 41.3 | 71.0 | 35 | 1.5 | 3.0 | 1.4 | 5.9 |
| 38 | Worango | *Flacourtia indica (Burm.f.) Merrill* | 45.0 | 67.5 | 65 | 1.7 | 2.8 | 2.6 | 7.1 |
| 39 | Xixiribbo | *Canthium oligocarpum Hiern* | 25.0 | 61.2 | 45 | 0.9 | 2.6 | 1.8 | 5.3 |
| 40 | Yaahoo | *Phoenix reclinata Jacq.* | 31.3 | 55.8 | 60 | 1.2 | 2.3 | 2.4 | 5.9 |
| 41 | Yaayyo | *Olea welwitschii (Knobl.) Gilg & Schellenb.* | 18.8 | 46.9 | 50 | 0.7 | 2.0 | 2.0 | 4.7 |
| 42 | Yabbo | *Fagaropsis angolensis (Engl.) Dale* | 32.5 | 53.3 | 25 | 1.2 | 2.2 | 1.0 | 4.5 |
| 43 | Yago/berebere | *Millettia ferruginea (Hochst.) Bak.* | 18.8 | 61.2 | 30 | 0.7 | 2.6 | 1.2 | 4.5 |
| 44 | Yeno | *Trilepisium madagascariense DC* | 71.3 | 23.4 | 65 | 6.8 | 1.0 | 2.6 | 10.4 |
| 45 | Yuddo | *Dracaena steudneri Engler* | 35.0 | 53.3 | 55 | 1.3 | 2.2 | 2.2 | 5.8 |
| **Total** | |  | **1636.3** | **2381.5** | **2475** | **100.0** | **100.0** | **100.0** | **300.0** |

**Appendix 7: Seedling, sapling and Tree per hectare of woody species in MFBR**

| **No** | **Species Local Name** | **Species Scientifica Name** | **TD** | **%** | **SpD** | **%** | **SD** | **%** | **RS** |
| --- | --- | --- | --- | --- | --- | --- | --- | --- | --- |
| 1 | Abe | *Ficus mucuso (Ficatho)* | 22.2 | 1.6 | 30.3 | 2.5 | 0.0 | 0.0 | P |
| 2 | Amato | *Pycnostachys eminii Gurke,* | 10.6 | 0.8 | 3.8 | 0.3 | 23.8 | 0.7 | F |
| 3 | Ayimoto | *Psychotria orophila Petit* | 5.6 | 0.4 | 3.1 | 0.3 | 0.9 | 0.0 | F |
| 4 | Beni | *Allophylus macrobotrys Gilg* | 6.3 | 0.5 | 22.2 | 1.8 | 3.4 | 0.1 | F |
| 5 | Bobokoye | *Rothmannia urceliformis (Hiern) Robyns* | 4.1 | 0.3 | 19.4 | 1.6 | 1.3 | 0.0 | F |
| 6 | Boqo/Boko | *Bersama abyssinica Fresen* | 3.1 | 0.2 | 4.4 | 0.4 | 1.3 | 0.0 | F |
| 7 | Boyti | *Oxyanthus speciosus DC* | 5.0 | 0.4 | 10.3 | 0.9 | 0.0 | 0.0 | P |
| 8 | Bunoo/kari | *Coffea arabica L.* | 6.6 | 0.5 | 10.9 | 0.9 | 17.5 | 0.5 | G |
| 9 | Caatto | *Albizia Schimperiana Oliv.* | 10.0 | 0.7 | 1.3 | 0.1 | 7.8 | 0.2 | F |
| 10 | Chato/sesa | *Albizia gummifera (J.F.Gmel.) C.A. Sm.* | 9.1 | 0.7 | 2.2 | 0.2 | 12.5 | 0.4 | F |
| 11 | Coqimato | *Dracaena afromontana Mildbr.* | 10.9 | 0.8 | 3.8 | 0.3 | 2.5 | 0.1 | F |
| 12 | Dampe/Dao/wanza | *Cordia Africana Lam.* | 26.3 | 1.9 | 5.6 | 0.5 | 6.3 | 0.2 | F |
| 13 | Dasoye | *Mallotus oppositifolius (Geisel) Mull* | 21.9 | 1.6 | 181.6 | 15.1 | 27.5 | 0.8 | F |
| 14 | Dibo | *Rothmannia urcelliformis (Hiern) Robyns* | 8.1 | 0.6 | 5.0 | 0.4 | 19.7 | 0.6 | F |
| 15 | Dido | *Galiniera saxifraga (Hochst.) Bridson* | 16.3 | 1.2 | 22.5 | 1.9 | 45.3 | 1.3 | G |
| 16 | Didoye | *Fagaropsis angolensis (Engl.) Dale* | 5.9 | 0.4 | 9.1 | 0.8 | 4.1 | 0.1 | F |
| 17 | Duwe | *Baphia abyssinica Brummit* | 48.8 | 3.6 | 50.9 | 4.2 | 149.1 | 4.3 | G |
| 18 | Ebi | *Dracaena steudneri Engl* | 9.1 | 0.7 | 8.1 | 0.7 | 0.6 | 0.0 | F |
| 19 | Elemasoye | *Vernonia hochstetteri Sch.Bip.ex.Walp* | 3.8 | 0.3 | 15.9 | 1.3 | 13.8 | 0.4 | F |
| 20 | Eqibelo | *Solanecio mannii (Hook. f) C. Jeffrey* | 7.5 | 0.6 | 11.3 | 0.9 | 10.0 | 0.3 | F |
| 21 | Erere | *Ritchiea albersii Gilg* | 24.4 | 1.8 | 3.8 | 0.3 | 9.4 | 0.3 | F |
| 22 | Eruye | *Lepisnthes senegalensis (Juss.ex.poir) Leenh* | 5.6 | 0.4 | 15.3 | 1.3 | 2.8 | 0.1 | F |
| 23 | Esek | *Morus mesozygia Stapf.* | 19.1 | 1.4 | 6.9 | 0.6 | 18.1 | 0.5 | F |
| 24 | Eto/shola | *Ficus sur Forssk.* | 5.9 | 0.4 | 4.7 | 0.4 | 1.3 | 0.0 | F |
| 25 | Gachoo | *Euphorbia ampliphylla Pax* | 5.3 | 0.4 | 0.0 | 0.0 | 3.1 | 0.1 | P |
| 26 | Gegin | *Erythroxylum fischeri Engl.* | 5.3 | 0.4 | 6.6 | 0.5 | 2.5 | 0.1 | F |
| 27 | Gele | *Trichilia prieuriana A.juss* | 25.6 | 1.9 | 9.4 | 0.8 | 42.2 | 1.2 | F |
| 28 | Geltegni | *Teclea nobilis Del.* | 10.6 | 0.8 | 12.5 | 1.0 | 18.4 | 0.5 | G |
| 29 | Gidi | *Leptaspis zeylanica Nees ex Steud.* | 5.0 | 0.4 | 5.3 | 0.4 | 0.0 | 0.0 | P |
| 30 | Goboye | *Grewia mollis A. Juss.* | 24.4 | 1.8 | 9.1 | 0.8 | 100.9 | 2.9 | F |
| 31 | Goje | *Manilkara butugi Chiov* | 9.4 | 0.7 | 2.2 | 0.2 | 14.7 | 0.4 | F |
| 32 | Gomuye | *Pouteria altissima (A.Chev.) Baehni* | 64.1 | 4.7 | 28.1 | 2.3 | 273.1 | 7.9 | F |
| 33 | Kenchi/Dakey | *Ficus exasperate Vahl* | 16.9 | 1.3 | 15.9 | 1.3 | 8.1 | 0.2 | F |
| 34 | Keresho | *Vernonia amygdalina Del.* | 8.8 | 0.6 | 1.6 | 0.1 | 1.3 | 0.0 | F |
| 35 | Kershe | *Polyscias fulva (Hiern) Harms* | 2.8 | 0.2 | 10.0 | 0.8 | 12.8 | 0.4 | G |
| 36 | Ketewan | *Pittosporum viriflorum Sims* | 4.1 | 0.3 | 2.2 | 0.2 | 11.9 | 0.3 | F |
| 37 | Keyang | *Blighia unijugata Bak.* | 45.6 | 3.4 | 28.4 | 2.4 | 220.0 | 6.4 | F |
| 38 | kobe | *Celtis zenkeri (A.Rich) wedd* | 81.3 | 6.0 | 31.3 | 2.6 | 189.7 | 5.5 | F |
| 39 | koke | *Celtis toka (Forssk. ) hepper.&.Wood* | 32.5 | 2.4 | 19.4 | 1.6 | 35.3 | 1.0 | F |
| 40 | Kuri | *Diospyros abyssinica (Hiern) F.White* | 31.6 | 2.3 | 43.8 | 3.6 | 606.6 | 17.5 | G |
| 41 | Loresise | *Vernonia amygdalina del* | 15.6 | 1.2 | 3.1 | 0.3 | 30.3 | 0.9 | F |
| 42 | Manchi buto | *Polyscias fulva (Hiern) Harms* | 4.7 | 0.3 | 2.8 | 0.2 | 3.4 | 0.1 | F |
| 43 | Mange | *Lecaniodiscus fraxinifolius Bak* | 59.4 | 4.4 | 55.6 | 4.6 | 168.4 | 4.9 | F |
| 44 | Mangirexxo | *Pentas schimperiana (A. Rich.) Vatke* | 7.8 | 0.6 | 21.9 | 1.8 | 27.2 | 0.8 | G |
| 45 | Manjo/getema | *Schefflera abyssinica (Hochst. ex A. Rich.) Harms* | 16.9 | 1.3 | 3.8 | 0.3 | 1.9 | 0.1 | F |
| 46 | Meregone/Kerewaye | *Ficus ovate Vahl* | 14.1 | 1.0 | 13.4 | 1.1 | 8.4 | 0.2 | F |
| 47 | Mergeto | *Vepris dainellii (Pic. Serm.) Kokwaro* | 10.9 | 0.8 | 13.4 | 1.1 | 14.4 | 0.4 | G |
| 48 | Mesho | *Vernonia auriculifera Hiern* | 11.3 | 0.8 | 10.3 | 0.9 | 20.6 | 0.6 | F |
| 49 | Omo/tekure enchete | *Triumfetta tomentosa Boj.* | 5.0 | 0.4 | 9.4 | 0.8 | 7.2 | 0.2 | F |
| 50 | Orero | *Prunus africana (Hook.f.) Kalkm* | 10.6 | 0.8 | 4.4 | 0.4 | 15.9 | 0.5 | F |
| 51 | Pishino | *Ekebergia capensis Sparrm* | 22.5 | 1.7 | 32.8 | 2.7 | 79.7 | 2.3 | G |
| 52 | Qararo | *Dracaena afromontana Mildbr.* | 11.3 | 0.8 | 11.3 | 0.9 | 9.7 | 0.3 | F |
| 53 | Qero | *Schefflera myriantha (Bak) Drake* | 11.3 | 0.8 | 0.0 | 0.0 | 8.1 | 0.2 | P |
| 54 | Qeto | *Pouteria adolfi-friederici (Engl.) Baehni* | 10.0 | 0.7 | 17.2 | 1.4 | 29.7 | 0.9 | G |
| 55 | Sanchore | *Margaritaria discoidea (Baill.) Webster* | 18.8 | 1.4 | 45.3 | 3.8 | 10.6 | 0.3 | F |
| 56 | Sati | *Albizia grandibracteata Taub* | 9.4 | 0.7 | 4.7 | 0.4 | 15.9 | 0.5 | F |
| 57 | Semberegn | *Combretum molle R. Br. ex G. Don* | 15.9 | 1.2 | 2.5 | 0.2 | 3.8 | 0.1 | F |
| 58 | Semeti | *Ficus thonningii Blume* | 3.1 | 0.2 | 0.0 | 0.0 | 18.8 | 0.5 | P |
| 59 | Semiyang | *Ficus sur Forssk* | 19.1 | 1.4 | 5.9 | 0.5 | 25.3 | 0.7 | F |
| 60 | Seso | *Ilex mitis (L.) Radlk.* | 5.0 | 0.4 | 16.9 | 1.4 | 13.1 | 0.4 | G |
| 61 | Setole | *Garcinia buchananii Baker* | 5.0 | 0.4 | 1.3 | 0.1 | 4.7 | 0.1 | F |
| 62 | Shahiyo | *Lepidotrichilia volkensii (Gurke) Leroy* | 3.8 | 0.3 | 0.0 | 0.0 | 0.0 | 0.0 | NR |
| 63 | Shakkaro | *Macaranga capensis (Baill.) Sim* | 5.3 | 0.4 | 1.6 | 0.1 | 0.6 | 0.0 | P |
| 64 | Shao | *Allophylus abyssinicus (Hochst.) Radlk.* | 11.3 | 0.8 | 10.9 | 0.9 | 15.0 | 0.4 | F |
| 65 | Shito | *Bothriocline schimperi Olivo & Hiern ex Benth.* | 7.2 | 0.5 | 1.3 | 0.1 | 1.3 | 0.0 | F |
| 66 | Shomo/Somoyebesana | Croton macrostachyus Del. | 22.8125 | 1.7 | 74.7 | 6.2 | 184.1 | 5.3 | G |
| 67 | Shotele | *Alangium chinense (Lour.) Harms* | 6.3 | 0.5 | 2.5 | 0.2 | 14.1 | 0.4 | F |
| 68 | Shoto | *Alangium chinense (Lour.) Harms* | 10.3 | 0.8 | 14.1 | 1.2 | 8.1 | 0.2 | F |
| 69 | Shukushi | *Cyathea manniana Hook* | 5.0 | 0.4 | 0.0 | 0.0 | 0.0 | 0.0 | NR |
| 70 | Sinsino | *Olea capensis L.* | 24.1 | 1.8 | 11.3 | 0.9 | 10.3 | 0.3 | F |
| 71 | Sisi | *Pouteria alnifolia (Bak.) Roberty* | 7.5 | 0.6 | 3.4 | 0.3 | 20.9 | 0.6 | F |
| 72 | Sokoshi | *Croton sylvaticus Krauss* | 32.5 | 2.4 | 8.1 | 0.7 | 90.9 | 2.6 | F |
| 73 | Songoboye | *Ficus exasperata Vahl* | 10.6 | 0.8 | 1.9 | 0.2 | 0.0 | 0.0 | P |
| 74 | Tengi | *Antiaris toxicaria Resch* | 48.4 | 3.6 | 32.8 | 2.7 | 438.1 | 12.7 | F |
| 75 | Tokun | *Apodytes dimidiata E. Mey. ex Arn.* | 8.1 | 0.6 | 0.0 | 0.0 | 6.6 | 0.2 | P |
| 76 | Ufo | *Trema orientalis (L.) Bl.* | 4.4 | 0.3 | 0.0 | 0.0 | 0.0 | 0.0 | NR |
| 77 | Upuye | *Celtis africana Burm.f.* | 9.7 | 0.7 | 2.5 | 0.2 | 3.4 | 0.1 | F |
| 78 | Usume | *Buddleja polystachya Fresen.* | 6.3 | 0.5 | 0.0 | 0.0 | 10.6 | 0.3 | P |
| 79 | Wagaamo | *Ehretia cymosa Thonn.* | 7.5 | 0.6 | 6.3 | 0.5 | 15.9 | 0.5 | F |
| 80 | Washo | *Elaeodendron buchananii (Loes.) Loes.* | 10.0 | 0.7 | 5.6 | 0.5 | 11.3 | 0.3 | F |
| 81 | Weralo | *Cassipourea malosana (Baker) Alston* | 10.3 | 0.8 | 3.1 | 0.3 | 1.9 | 0.1 | F |
| 82 | Woleloye | Dombeya torrida (J.F.Gmel.) P. Bamps | 4.7 | 0.3 | 0.0 | 0.0 | 4.7 | 0.1 | P |
| 83 | Woni | Mimusops lanceolata A.DC | 14.1 | 1.0 | 5.9 | 0.5 | 41.6 | 1.2 | F |
| 84 | Worango | *Flacourtia indica (Burm.f.) Merril* | 11.3 | 0.8 | 4.4 | 0.4 | 8.8 | 0.3 | F |
| 85 | Worege | *Millettia ferruginea (Hochst.) Baker* | 10.9 | 0.8 | 5.9 | 0.5 | 2.2 | 0.1 | F |
| 86 | Xixiribbo | *Canthium oligocarpum Hiern* | 6.3 | 0.5 | 0.0 | 0.0 | 7.5 | 0.2 | P |
| 87 | Yaahoo | *Phoenix reclinata Jacq.* | 8.1 | 0.6 | 5.0 | 0.4 | 1.6 | 0.0 | F |
| 88 | Yaayyo | *Olea welwitschii (Knobl.) Gilg & Schellenb.* | 7.8 | 0.6 | 2.8 | 0.2 | 5.9 | 0.2 | F |
| 89 | Yabbo | *Fagaropsis angolensis (Engl.) Dale* | 4.7 | 0.3 | 7.8 | 0.6 | 8.4 | 0.2 | G |
| 90 | Yago/berebere | *Millettia ferruginea (Hochst.) Bak.* | 4.7 | 0.3 | 0.0 | 0.0 | 0.6 | 0.0 | P |
| 91 | Yeno | *Trilepisium madagascariense DC* | 17.8 | 1.3 | 15.0 | 1.2 | 41.3 | 1.2 | F |
| 92 | Yuddo | *Dracaena steudneri Engler* | 8.8 | 0.6 | 3.4 | 0.3 | 9.1 | 0.3 | F |
| 93 | Yuye | *Deinbollia Kilimandschrica Taub* | 14.4 | 1.1 | 13.1 | 1.1 | 18.8 | 0.5 | F |
| 94 | Zeme/Jeme | *Lannea welwitschii (Hiern) Engl.* | 28.8 | 2.1 | 5.9 | 0.5 | 41.3 | 1.2 | F |
| **Total** | |  |  | **100.0** | **1203.1** | **100.0** | **3461.3** | **100.0** |  |

**Appendix 8: Seedling, sapling and Tree ha-1 of woody species with regeneration status in study site I**

| No | Species Name | Species Scintifica Name | AD | % | SpD | % | SD | % | RS |
| --- | --- | --- | --- | --- | --- | --- | --- | --- | --- |
| 1 | kobe | *Celtis zenkeri (A.Rich) wedd* | 59.2 | 7.9 | 36.7 | 10.8 | 58.3 | 6.0 | F |
| 2 | Mange | *Lecaniodiscus fraxinifolius Bak.* | 39.6 | 5.3 | 27.9 | 8.3 | 56.7 | 5.8 | F |
| 3 | Gomuye | *Pouteria altissima (A.Chev.) Baehni* | 39.2 | 5.3 | 25.0 | 7.4 | 69.6 | 7.1 | F |
| 4 | Tengi | *Antiaris toxicaria Resch* | 32.9 | 4.4 | 13.8 | 4.1 | 87.1 | 8.9 | F |
| 5 | Kuri | *Diospyros abyssinica (Hiern) F.White* | 28.8 | 3.9 | 24.6 | 7.3 | 68.8 | 7.0 | F |
| 6 | koke | *Celtis zenkeri (A.Rich) wedd* | 26.3 | 3.5 | 7.9 | 2.3 | 22.1 | 2.3 | F |
| 7 | Keyang | *Blighia unijugata Bak.* | 23.8 | 3.2 | 10.4 | 3.1 | 129.2 | 13.2 | F |
| 8 | Didoye | *Fagaropsis angolensis (Engl.) Dale* | 22.9 | 3.1 | 0.0 | 0.0 | 0.0 | 0.0 | NR |
| 9 | Esek | Morus mesozygia Stapf. | 20.4 | 2.7 | 9.2 | 2.7 | 19.6 | 2.0 | F |
| 10 | Loresise | *Vernonia amygdalina del* | 20.4 | 2.7 | 21.3 | 6.3 | 23.3 | 2.4 | G |
| 11 | Goboye | *Grewia mollis A. Juss.* | 18.8 | 2.5 | 5.0 | 1.5 | 88.8 | 9.1 | F |
| 12 | Semeti | *Ficus thonningii Blume* | 18.8 | 2.5 | 16.7 | 4.9 | 25.0 | 2.6 | F |
| 13 | Usume | *Buddleja polystachya Fresen.* | 18.8 | 2.5 | 7.5 | 2.2 | 14.2 | 1.4 | F |
| 14 | Gele | Trichilia prieuriana A.juss | 18.3 | 2.5 | 8.8 | 2.6 | 16.3 | 1.7 | F |
| 15 | Elemasoye | *Vernonia hochstetteri Sch.Bip.ex.Walp* | 17.9 | 2.4 | 1.7 | 0.5 | 18.3 | 1.9 | F |
| 16 | Duwe | *Baphia abyssinica Brummit* | 17.1 | 2.3 | 15.0 | 4.4 | 47.1 | 4.8 | F |
| 17 | Semberegn | *Combretum molle R. Br. ex G. Don* | 16.7 | 2.2 | 2.9 | 0.9 | 1.3 | 0.1 | F |
| 18 | Shotele | *Leptaspis zeylanica Nees ex Steud.* | 16.3 | 2.2 | 3.8 | 1.1 | 18.8 | 1.9 | F |
| 19 | Abe | *Ficus mucuso (Ficatho)* | 15.8 | 2.1 | 1.3 | 0.4 | 0.0 | 0.0 | P |
| 20 | Ebi | *Dracaena steudneri Engl* | 15.8 | 2.1 | 0.0 | 0.0 | 0.0 | 0.0 | NR |
| 21 | Tokun | *Apodytes dimidiata E. Mey. ex Arn.* | 15.8 | 2.1 | 0.8 | 0.2 | 8.8 | 0.9 | P |
| 22 | Zeme/Jeme | *Lannea welwitschii (Hiern) Engl.* | 15.8 | 2.1 | 16.3 | 4.8 | 30.8 | 3.2 | G |
| 23 | Erere | *Ritchiea albersii Gilg* | 15.4 | 2.1 | 11.7 | 3.4 | 11.7 | 1.2 | G |
| 24 | Semiyang | *Ficus sur Forssk* | 15.4 | 2.1 | 0.4 | 0.1 | 12.1 | 1.2 | P |
| 25 | Somoye | *Croton sylvaticus Krauss* | 15.0 | 2.0 | 6.7 | 2.0 | 24.2 | 2.5 | F |
| 26 | Geltegni | *Teclea nobilis Del.* | 14.2 | 1.9 | 2.1 | 0.6 | 12.9 | 1.3 | F |
| 27 | Sati | *Albizia grandibracteata Taub* | 14.2 | 1.9 | 4.2 | 1.2 | 18.8 | 1.9 | F |
| 28 | Dasoye | *Mallotus oppositifolius (Geisel) Mull* | 13.8 | 1.8 | 18.8 | 5.5 | 33.3 | 3.4 | G |
| 29 | Eruye | *Lepisnthes senegalensis (Juss.ex.poir) Leenh* | 13.3 | 1.8 | 1.3 | 0.4 | 3.8 | 0.4 | F |
| 30 | Setole | *Garcinia buchananii Baker* | 13.3 | 1.8 | 0.0 | 0.0 | 1.3 | 0.1 | P |
| 31 | Sokoshi | *Pouteria alnifolia (Bak.) Roberty* | 12.5 | 1.7 | 7.9 | 2.3 | 15.4 | 1.6 | F |
| 32 | Yuye | *Deinbollia Kilimandschrica Taub* | 12.5 | 1.7 | 5.8 | 1.7 | 12.9 | 1.3 | F |
| 33 | Worege | *Millettia ferruginea (Hochst.) Baker* | 10.4 | 1.4 | 6.3 | 1.8 | 0.0 | 0.0 | P |
| 34 | Gegin | *Erythroxylum fischeri Engl.* | 9.6 | 1.3 | 2.1 | 0.6 | 0.0 | 0.0 | P |
| 35 | Sanchore | *Margaritaria discoidea (Baill.) Webster* | 9.2 | 1.2 | 0.0 | 0.0 | 0.0 | 0.0 | NR |
| 36 | Woni | *Mimusops lanceolata A.DC* | 9.2 | 1.2 | 3.3 | 1.0 | 5.8 | 0.6 | F |
| 37 | Woleloye | *Dombeya torrida (J.F.Gmel.) P. Bamps* | 8.8 | 1.2 | 1.7 | 0.5 | 4.2 | 0.4 | P |
| 38 | Kershe | *Polyscias fulva (Hiern) Harms* | 7.9 | 1.1 | 3.3 | 1.0 | 8.8 | 0.9 | F |
| 39 | Upuye | *Celtis africana Burm.f.* | 7.5 | 1.0 | 0.0 | 0.0 | 0.0 | 0.0 | NR |
| 40 | Bobokoye | *Rothmannia urceliformis (Hiern) Robyns* | 7.1 | 0.9 | 0.0 | 0.0 | 0.8 | 0.1 | P |
| 41 | Goje | *Manilkara butugi Chiov* | 6.7 | 0.9 | 0.0 | 0.0 | 0.0 | 0.0 | NR |
| 42 | Ketewan | *Pittosporum viriflorum Sims* | 6.3 | 0.8 | 4.2 | 1.2 | 6.3 | 0.6 | F |
| 43 | Kari | *Coffea arabica L.* | 5.4 | 0.7 | 2.5 | 0.7 | 2.9 | 0.3 | F |
|  | **Mean ± Std. error** |  | 746.7 ± 1.5 | 100.1 | 338.3 ± 1.2 | 100.0 | 978.8 ± 3.8 | 100.0 |  |

**Appendix 9: Seedling, sapling and Tree ha-1 of woody species with regeneration status in study site II**

| 1 | Species Name | Species Scintifica Name | AD | % | SpD | % | SD | % | RS |
| --- | --- | --- | --- | --- | --- | --- | --- | --- | --- |
| 2 | Gomuye | *Pouteria altissima (A.Chev.) Baehni* | 47.9 | 6.1 | 30.4 | 8.0 | 137.9 | 15.9 | F |
| 3 | Kobe | *Celtis zenkeri (A.Rich) wedd* | 45.8 | 5.9 | 28.8 | 7.6 | 76.7 | 8.8 | F |
| 4 | Mange | *Lecaniodiscus fraxinifolius Bak.* | 45.0 | 5.7 | 66.7 | 17.6 | 123.3 | 14.2 | G |
| 5 | Tengi | *Antiaris toxicaria Resch* | 37.9 | 4.8 | 21.3 | 5.6 | 110.0 | 12.6 | F |
| 6 | Duwe | *Baphia abyssinica Brummit* | 37.5 | 4.8 | 58.8 | 15.5 | 94.6 | 10.9 | G |
| 7 | Sokoshi | *Pouteria alnifolia (Bak.) Roberty* | 27.1 | 3.5 | 4.6 | 1.2 | 27.9 | 3.2 | F |
| 8 | Goboye | *Grewia mollis A. Juss.* | 26.3 | 3.4 | 4.6 | 1.2 | 38.3 | 4.4 | F |
| 9 | Zeme/Jeme | *Lannea welwitschii (Hiern) Engl.* | 24.6 | 3.1 | 5.8 | 1.5 | 16.3 | 1.9 | F |
| 10 | Erere | *Ritchiea albersii Gilg* | 23.5 | 3.0 | 0.0 | 0.0 | 0.0 | 0.0 | NR |
| 11 | Semiyang | *Ficus sur Forssk* | 23.4 | 3.0 | 4.6 | 1.2 | 21.7 | 2.5 | F |
| 12 | Boyti | *Oxyanthus speciosus DC* | 23.3 | 3.0 | 0.0 | 0.0 | 0.0 | 0.0 | NR |
| 13 | Beni | *Allophylus macrobotrys Gilg* | 22.9 | 2.9 | 1.7 | 0.4 | 4.6 | 0.5 | F |
| 14 | Kenchi/Dakey | *Ficus exasperate Vahl* | 21.3 | 2.7 | 2.5 | 0.7 | 5.8 | 0.7 | F |
| 15 | Meregone/Kerewaye | *Ficus ovate Vahl* | 20.8 | 2.7 | 7.5 | 2.0 | 5.0 | 0.6 | F |
| 16 | Abe | *Ficus mucuso (Ficatho)* | 20.0 | 2.6 | 3.8 | 1.0 | 0.0 | 0.0 | P |
| 17 | Loresise | *Vernonia amygdalina del* | 20.0 | 2.6 | 2.1 | 0.5 | 15.4 | 1.8 | F |
| 18 | Ebi | *Dracaena steudneri Engl* | 19.2 | 2.4 | 1.7 | 0.4 | 0.8 | 0.1 | P |
| 19 | Gele | *Trichilia prieuriana A.juss* | 18.8 | 2.4 | 10.4 | 2.7 | 20.0 | 2.3 | F |
| 20 | Koke | *Celtis toka (Forssk. ) hepper.&.Wood* | 17.5 | 2.2 | 21.3 | 5.6 | 23.3 | 2.7 | G |
| 21 | Songoboye | *Ficus exasperata Vahl* | 17.1 | 2.2 | 0.8 | 0.2 | 2.9 | 0.3 | P |
| 22 | Sisi | *Olea capensis L.* | 15.8 | 2.0 | 0.0 | 0.0 | 0.0 | 0.0 | NR |
| 23 | Sanchore | *Margaritaria discoidea (Baill.) Webster* | 15.4 | 2.0 | 25.4 | 6.7 | 13.8 | 1.6 | F |
| 24 | Yuye | *Deinbollia Kilimandschrica Taub* | 15.0 | 1.9 | 17.5 | 4.6 | 7.1 | 0.8 | F |
| 25 | Keyang | *Blighia unijugata Bak.* | 14.6 | 1.9 | 5.4 | 1.4 | 13.8 | 1.6 | F |
| 26 | Kuri | *Diospyros abyssinica (Hiern) F.White* | 14.2 | 1.8 | 25.0 | 6.6 | 61.7 | 7.1 | G |
| 27 | Tokun | *Apodytes dimidiata E. Mey. ex Arn.* | 13.8 | 1.8 | 0.0 | 0.0 | 0.0 | 0.0 | NR |
| 28 | Worege | *Millettia ferruginea (Hochst.) Baker* | 13.8 | 1.8 | 7.9 | 2.1 | 1.7 | 0.2 | F |
| 29 | Dampe | *Cordia Africana Lam.* | 13.0 | 1.7 | 2.5 | 0.7 | 0.0 | 0.0 | P |
| 30 | Gegin | *Erythroxylum fischeri Engl.* | 12.1 | 1.5 | 0.0 | 0.0 | 3.3 | 0.4 | P |
| 31 | Eruye | *Lepisnthes senegalensis (Juss.ex.poir) Leenh* | 10.8 | 1.4 | 3.8 | 1.0 | 0.0 | 0.0 | P |
| 32 | Somoye | *Croton sylvaticus Krauss* | 10.0 | 1.3 | 2.1 | 0.5 | 6.3 | 0.7 | F |
| 33 | Woni | *Mimusops lanceolata A.DC* | 10.0 | 1.3 | 5.4 | 1.4 | 7.1 | 0.8 | F |
| 34 | Gidi | *Croton macrostachyus Del.* | 9.6 | 1.2 | 0.0 | 0.0 | 0.0 | 0.0 | NR |
| 35 | Esek | *Morus mesozygia Stapf.* | 9.2 | 1.2 | 1.7 | 0.4 | 4.6 | 0.5 | F |
| 36 | Bobokoye | *Rothmannia urceliformis (Hiern) Robyns* | 8.8 | 1.1 | 0.0 | 0.0 | 0.0 | 0.0 | NR |
| 37 | Sati | *Albizia grandibracteata Taub* | 8.8 | 1.1 | 0.0 | 0.0 | 2.5 | 0.3 | P |
| 38 | Goje | *Manilkara butugi Chiov* | 8.3 | 1.1 | 1.7 | 0.4 | 5.0 | 0.6 | F |
| 39 | Woleloye | *Dombeya torrida (J.F.Gmel.) P. Bamps* | 7.9 | 1.0 | 0.0 | 0.0 | 1.3 | 0.1 | P |
| 40 | Didoye | *Fagaropsis angolensis (Engl.) Dale* | 7.5 | 1.0 | 1.7 | 0.4 | 5.4 | 0.6 | F |
| 41 | Kari | *Coffea arabica L.* | 7.5 | 1.0 | 0.8 | 0.2 | 2.1 | 0.2 | P |
| 42 | Kershe | *Polyscias fulva (Hiern) Harms* | 6.3 | 0.8 | 1.7 | 0.4 | 8.3 | 1.0 | F |
| 43 | Dasoye | *Mallotus oppositifolius (Geisel) Mull* | 5.4 | 0.7 | 0.0 | 0.0 | 0.0 | 0.0 | NR |
| 44 | Ketewan | *Pittosporum viriflorum Sims* | 5.4 | 0.7 | 0.0 | 0.0 | 1.3 | 0.1 | P |
|  | **Mean ± Std. error** |  | 782.8 ± 1.6 | 100.0 | 379.6 ± 1.9 | 100.0 | 869.6 ± 4.5 | 100.0 |  |

**Appendix 10: Seedling, sapling and Tree ha-1 of woody species with regeneration status in study site III**

| No | Species Name | Species Scintifica Name | AD | % | SpD | % | SD | % | RS |
| --- | --- | --- | --- | --- | --- | --- | --- | --- | --- |
| 1 | Keyang | *Blighia unijugata Bak.* | 41.3 | 7.4 | 25.8 | 6.5 | 150.4 | 8.1 | F |
| 2 | Kobe | *Celtis zenkeri (A.Rich) wedd* | 40.4 | 7.3 | 10.8 | 2.7 | 117.9 | 6.4 | F |
| 3 | Gomuye | *Pouteria altissima (A.Chev.) Baehni* | 33.8 | 6.1 | 7.1 | 1.8 | 156.7 | 8.5 | F |
| 4 | Duwe | *Baphia abyssinica Brummit* | 27.1 | 4.9 | 9.2 | 2.3 | 57.1 | 3.1 | F |
| 5 | Tengi | *Antiaris toxicaria Resch* | 22.9 | 4.1 | 22.5 | 5.6 | 387.1 | 21.0 | F |
| 6 | Sokoshi | *Pouteria alnifolia (Bak.) Roberty* | 22.1 | 4.0 | 8.8 | 2.2 | 99.6 | 5.4 | F |
| 7 | Meregone/Kerewaye | *Ficus ovate Vahl* | 21.3 | 3.8 | 2.5 | 0.6 | 6.3 | 0.3 | F |
| 8 | Shukushi | *Alangium chinense (Lour.) Harms* | 20.8 | 3.8 | 0.0 | 0.0 | 0.0 | 0.0 | P |
| 9 | Dasoye | *Mallotus oppositifolius (Geisel) Mull* | 20.4 | 3.7 | 234.2 | 58.7 | 3.3 | 0.2 | F |
| 10 | Dampe | *Cordia Africana Lam.* | 20.0 | 3.6 | 0.0 | 0.0 | 0.0 | 0.0 | NR |
| 11 | Mange | *Lecaniodiscus fraxinifolius Bak.* | 20.0 | 3.6 | 7.5 | 1.9 | 44.6 | 2.4 | F |
| 12 | Gele | *Trichilia prieuriana A.juss* | 19.2 | 3.5 | 0.4 | 0.1 | 20.0 | 1.1 | F |
| 13 | Zeme/Jeme | *Lannea welwitschii (Hiern) Engl.* | 17.9 | 3.2 | 2.1 | 0.5 | 7.9 | 0.4 | F |
| 14 | Sanchore | *Margaritaria discoidea (Baill.) Webster* | 17.1 | 3.1 | 29.2 | 7.3 | 0.4 | 0.0 | F |
| 15 | Koke | *Celtis toka (Forssk. ) hepper.&.Wood* | 16.3 | 2.9 | 0.4 | 0.1 | 1.7 | 0.1 | F |
| 16 | Kuri | *Diospyros abyssinica (Hiern) F.White* | 15.8 | 2.9 | 14.6 | 3.7 | 678.3 | 36.7 | G |
| 17 | Upuye | *Celtis africana Burm.f.* | 15.4 | 2.8 | 3.3 | 0.8 | 4.6 | 0.2 | F |
| 18 | Semberegn | *Combretum molle R. Br. ex G. Don* | 15.0 | 2.7 | 1.3 | 0.3 | 3.8 | 0.2 | F |
| 19 | Yuye | *Deinbollia Kilimandschrica Taub* | 12.9 | 2.3 | 0.0 | 0.0 | 5.0 | 0.3 | P |
| 20 | Setole | *Garcinia buchananii Baker* | 12.1 | 2.2 | 0.0 | 0.0 | 5.0 | 0.3 | P |
| 21 | Gidi | *Croton macrostachyus Del.* | 11.7 | 2.1 | 4.2 | 1.0 | 0.0 | 0.0 | P |
| 22 | Kenchi/Dakey | *Ficus exasperate Vahl* | 11.7 | 2.1 | 2.5 | 0.6 | 5.0 | 0.3 | F |
| 23 | Loresise | *Vernonia amygdalina del* | 10.8 | 2.0 | 0.8 | 0.2 | 1.7 | 0.1 | F |
| 24 | Goboye | *Grewia mollis A. Juss.* | 10.4 | 1.9 | 3.8 | 0.9 | 7.5 | 0.4 | F |
| 25 | Woni | *Mimusops lanceolata A.DC* | 10.0 | 1.8 | 2.5 | 0.6 | 42.5 | 2.3 | F |
| 26 | Worege | *Millettia ferruginea (Hochst.) Baker* | 9.2 | 1.7 | 0.0 | 0.0 | 1.3 | 0.1 | P |
| 27 | Geltegni | *Teclea nobilis Del.* | 8.8 | 1.6 | 1.7 | 0.4 | 11.7 | 0.6 | F |
| 28 | Ketewan | *Pittosporum viriflorum Sims* | 8.3 | 1.5 | 2.5 | 0.6 | 8.3 | 0.5 | F |
| 29 | Goje | *Manilkara butugi Chiov* | 7.9 | 1.4 | 0.0 | 0.0 | 14.6 | 0.8 | P |
| 30 | Bobokoye | *Rothmannia urceliformis (Hiern) Robyns* | 6.3 | 1.1 | 0.8 | 0.2 | 0.8 | 0.0 | F |
| 31 | Esek | *Morus mesozygia Stapf.* | 6.3 | 1.1 | 0.0 | 0.0 | 0.0 | 0.0 | NR |
| 32 | Woleloye | *Dombeya torrida (J.F.Gmel.) P. Bamps* | 6.3 | 1.1 | 0.0 | 0.0 | 0.8 | 0.0 | P |
| 33 | Somoye | *Croton sylvaticus Krauss* | 5.8 | 1.1 | 0.4 | 0.1 | 1.7 | 0.1 | F |
| 34 | Erere | *Ritchiea albersii Gilg* | 5.0 | 0.9 | 0.0 | 0.0 | 0.8 | 0.0 | P |
| 35 | Abe | *Ficus mucuso (Ficatho)* | 4.2 | 0.8 | 0.0 | 0.0 | 0.0 | 0.0 | NR |
|  | **Mean ± Std. error** |  | 554.2 ± 1.47 | 100.0 | 398.9 ± 4.5 | 100.0 | 1846.3 ± 15.3 | 100.0 |  |

**Appendix 11: Seedling, sapling and Tree ha-1 of woody species with regeneration status in study site IV**

| 1 | Species Name | Species Scintifica Name | TD | % | SpD | % | SD | % | RS |
| --- | --- | --- | --- | --- | --- | --- | --- | --- | --- |
| 2 | Sinsino | *Cyathea manniana Hook* | 96 | 5.9 | 298.75 | 19.5 | 736.25 | 25.9 | G |
| 3 | Pishino | *Ekebergia capensis Sparrm* | 90 | 5.5 | 131.25 | 8.6 | 318.75 | 11.2 | G |
| 4 | Yeno | *Trilepisium madagascariense DC* | 71 | 4.4 | 60 | 3.9 | 165 | 5.8 | F |
| 5 | Manjo/getema | *Schefflera abyssinica (Hochst. ex A. Rich.) Harms* | 68 | 4.1 | 15 | 1.0 | 7.5 | 0.3 | F |
| 6 | Dido | *Galiniera saxifraga (Hochst.) Bridson* | 65 | 4.0 | 90 | 5.9 | 181.25 | 6.4 | G |
| 7 | Mesho | *Vernonia auriculifera Hiern* | 45 | 2.8 | 41.25 | 2.7 | 82.5 | 2.9 | F |
| 8 | Qero | *Schefflera myriantha (Bak) Drake* | 45 | 2.8 | 0 | 0.0 | 32.5 | 1.1 | P |
| 9 | Qararo | *Dracaena afromontana Mildbr.* | 45 | 2.8 | 45 | 2.9 | 38.75 | 1.4 | F |
| 10 | Shao | *Allophylus abyssinicus (Hochst.) Radlk.* | 45 | 2.8 | 10 | 0.7 | 60 | 2.1 | F |
| 11 | Worango | *Flacourtia indica (Burm.f.) Merril* | 45 | 2.8 | 17.5 | 1.1 | 35 | 1.2 | F |
| 12 | Coqimato | *Dracaena afromontana Mildbr.* | 44 | 2.7 | 15 | 1.0 | 10 | 0.4 | F |
| 13 | Mergeto | *Vepris dainellii (Pic. Serm.) Kokwaro* | 44 | 2.7 | 53.75 | 3.5 | 57.5 | 2.0 | G |
| 14 | Amato | *Pycnostachys eminii Gurke,* | 43 | 2.6 | 15 | 1.0 | 95 | 3.3 | F |
| 15 | Orero | *Prunus africana (Hook.f.) Kalkm* | 43 | 2.6 | 17.5 | 1.1 | 63.75 | 2.2 | F |
| 16 | Shoto | *Alangium chinense (Lour.) Harms* | 41 | 2.5 | 45 | 2.9 | 41.25 | 1.5 | F |
| 17 | Weralo | *Cassipourea malosana (Baker) Alston* | 41 | 2.5 | 12.5 | 0.8 | 7.5 | 0.3 | F |
| 18 | Caatto | *Albizia Schimperiana Oliv.* | 40 | 2.4 | 5 | 0.3 | 31.25 | 1.1 | F |
| 19 | Qeto | *Pouteria adolfi-friederici (Engl.) Baehni* | 40 | 2.4 | 68.75 | 4.5 | 118.75 | 4.2 | G |
| 20 | Washo | *Elaeodendron buchananii (Loes.) Loes.* | 40 | 2.4 | 22.5 | 1.5 | 45 | 1.6 | F |
| 21 | Chato/sesa | *Albizia gummifera (J.F.Gmel.) C.A. Sm.* | 36 | 2.2 | 8.75 | 0.6 | 50 | 1.8 | F |
| 22 | Keresho | *Vernonia amygdalina Del.* | 35 | 2.1 | 6.25 | 0.4 | 5 | 0.2 | F |
| 23 | Yuddo | *Dracaena steudneri Engler* | 35 | 2.1 | 13.75 | 0.9 | 36.25 | 1.3 | F |
| 24 | Dibo | *Rothmannia urcelliformis (Hiern) Robyns* | 33 | 2.0 | 20 | 1.3 | 78.75 | 2.8 | F |
| 25 | Yabbo | *Fagaropsis angolensis (Engl.) Dale* | 33 | 2.0 | 11.25 | 0.7 | 23.75 | 0.8 | G |
| 26 | Mangirexxo | *Pentas schimperiana (A. Rich.) Vatke* | 31 | 1.9 | 87.5 | 5.7 | 108.75 | 3.8 | G |
| 27 | Yaahoo | *Phoenix reclinata Jacq.* | 31 | 1.9 | 31.25 | 2.0 | 33.75 | 1.2 | G |
| 28 | Eqibelo | *Solanecio mannii (Hook. f) C. Jeffrey* | 30 | 1.8 | 45 | 2.9 | 40 | 1.4 | G |
| 29 | Shomo/besana | *Croton macrostachyus Del.* | 30 | 1.8 | 56.25 | 3.7 | 32.5 | 1.1 | F |
| 30 | Wagaamo | *Ehretia cymosa Thonn.* | 30 | 1.8 | 25 | 1.6 | 63.75 | 2.2 | F |
| 31 | Shito | *Bothriocline schimperi Olivo & Hiern ex Benth.* | 29 | 1.8 | 5 | 0.3 | 5 | 0.2 | F |
| 32 | Xixiribbo | *Canthium oligocarpum Hiern* | 25 | 1.5 | 0 | 0.0 | 30 | 1.1 | P |
| 33 | Eto/shola | *Ficus sur Forssk.* | 24 | 1.5 | 18.75 | 1.2 | 5 | 0.2 | F |
| 34 | Ayimoto | *Psychotria orophila Petit* | 23 | 1.4 | 12.5 | 0.8 | 3.75 | 0.1 | F |
| 35 | Gachoo | *Euphorbia ampliphylla Pax* | 21 | 1.3 | 0 | 0.0 | 12.5 | 0.4 | P |
| 36 | Shakkaro | *Macaranga capensis (Baill.) Sim* | 21 | 1.3 | 6.25 | 0.4 | 2.5 | 0.1 | F |
| 37 | Dao/wanza | *Alangium chinense (Lour.) Harms* | 20 | 1.2 | 22.5 | 1.5 | 0 | 0.0 | P |
| 38 | Omo/tekure enchete | *Triumfetta tomentosa Boj.* | 20 | 1.2 | 37.5 | 2.4 | 28.75 | 1.0 | F |
| 39 | Seso | *Ilex mitis (L.) Radlk.* | 20 | 1.2 | 67.5 | 4.4 | 52.5 | 1.9 | F |
| 40 | Bunoo | *Coffea arabica L.* | 19 | 1.1 | 17.5 | 1.1 | 5 | 0.2 | F |
| 41 | Manchi buto | *Polyscias fulva (Hiern) Harms* | 19 | 1.1 | 11.25 | 0.7 | 13.75 | 0.5 | F |
| 42 | Yaayyo | *Olea welwitschii (Knobl.) Gilg & Schellenb.* | 19 | 1.1 | 20 | 1.3 | 6.25 | 0.2 | F |
| 43 | Yago/berebere | *Millettia ferruginea (Hochst.) Bak.* | 19 | 1.1 | 0 | 0.0 | 2.5 | 0.1 | P |
| 44 | Ufo | *Trema orientalis (L.) Bl.* | 18 | 1.1 | 0 | 0.0 | 0 | 0.0 | NR |
| 45 | Shahiyo | *Lepidotrichilia volkensii (Gurke) Leroy* | 15 | 0.9 | 0 | 0.0 | 0 | 0.0 | NR |
| 46 | Boqo/Boko | *Bersama abyssinica Fresen* | 13 | 1 | 43.75 | 2.9 | 70 | 2.5 | G |
|  | **Mean ± Std. error** |  | 1636 ± 2.7 | 100 | 1531.25 ± 17.6 | 100.0 | 2837.5 ± 7.3 | 100.0 |  |

**Appendix 12: Dominant trees with their percentage basal area of MFBR**

| **No** | **Species Local Name** | **Species Scientific Name** | **Density/ha** | **Average DBH** | **BA (m2)** | **% of BA** |
| --- | --- | --- | --- | --- | --- | --- |
| 1 | Abe | *Ficus mucuso (Ficatho)* | 22.2 | 27.5 | 1.3 | 0.95 |
| 2 | Amato | *Pycnostachys eminii Gurke,* | 10.6 | 6 | 1.1 | 0.81 |
| 3 | Ayimoto | *Psychotria orophila Petit* | 5.6 | 11 | 1.3 | 0.95 |
| 4 | Beni | *Allophylus macrobotrys Gilg* | 6.3 | 44 | 0.7 | 0.52 |
| 5 | Bobokoye | *Rothmannia urceliformis (Hiern) Robyns* | 4.1 | 44.5 | 1.3 | 0.95 |
| 6 | Boqo/Boko | *Bersama abyssinica Fresen* | 3.1 | 12 | 1.2 | 0.88 |
| 7 | Boyti | *Oxyanthus speciosus DC* | 5.0 | 43 | 1.3 | 0.95 |
| 8 | Bunoo/kari | *Coffea arabica L.* | 6.6 | 20.5 | 1.1 | 0.81 |
| 9 | Caatto | *Albizia Schimperiana Oliv.* | 10.0 | 26 | 1.3 | 0.95 |
| 10 | Chato/sesa | *Albizia gummifera (J.F.Gmel.) C.A. Sm.* | 9.1 | 16.5 | 1.3 | 0.95 |
| 11 | Coqimato | *Dracaena afromontana Mildbr.* | 10.9 | 15.5 | 1.5 | 1.10 |
| 12 | Dampe/Dao/wanza | *Cordia Africana Lam.* | 28.8 | 21.6 | 2.5 | 1.82 |
| 13 | Dasoye | *Mallotus oppositifolius (Geisel) Mull* | 21.9 | 21.6 | 1.1 | 0.77 |
| 14 | Dibo | *Rothmannia urcelliformis (Hiern) Robyns* | 8.1 | 8 | 1.1 | 0.81 |
| 15 | Dido | *Galiniera saxifraga (Hochst.) Bridson* | 16.3 | 20 | 1.6 | 1.16 |
| 16 | Didoye | *Fagaropsis angolensis (Engl.) Dale* | 5.9 | 13.5 | 1.5 | 1.10 |
| 17 | Duwe | *Baphia abyssinica Brummit* | 48.8 | 30 | 2.5 | 1.82 |
| 18 | Ebi | *Dracaena steudneri Engl* | 9.1 | 25.8 | 1.6 | 1.16 |
| 19 | Elemasoye | *Vernonia hochstetteri Sch.Bip.ex.Walp* | 3.8 | 63 | 1.7 | 1.24 |
| 20 | Eqibelo | *Solanecio mannii (Hook. f) C. Jeffrey* | 7.5 | 27 | 1.1 | 0.77 |
| 21 | Erere | Ritchiea albersii Gilg | 24.4 | 4 | 1.8 | 1.31 |
| 22 | Eruye | Lepisnthes senegalensis (Juss.ex.poir) Leenh | 5.6 | 44 | 1.5 | 1.05 |
| 23 | Esek | Morus mesozygia Stapf. | 19.1 | 5 | 1.5 | 1.10 |
| 24 | Eto/shola | *Ficus sur Forssk.* | 5.9 | 7 | 2.4 | 1.70 |
| 25 | Gachoo | *Euphorbia ampliphylla Pax* | 5.3 | 19 | 0.8 | 0.56 |
| 26 | Gegin | *Erythroxylum fischeri Engl.* | 5.3 | 20.5 | 0.8 | 0.61 |
| 27 | Gele | Trichilia prieuriana A.juss | 25.6 | 15.5 | 1.8 | 1.26 |
| 28 | Geltegni | *Teclea nobilis Del.* | 10.6 | 16.7 | 1.2 | 0.89 |
| 29 | Gidi | Croton macrostachyus Del. | 5.0 | 14.2 | 1.1 | 0.81 |
| 30 | Goboye | *Grewia mollis A. Juss.* | 24.4 | 15 | 1.3 | 0.95 |
| 31 | Goje | Manilkara butugi Chiov | 9.4 | 10 | 1.3 | 0.95 |
| 32 | Gomuye | *Pouteria altissima (A.Chev.) Baehni* | 64.1 | 16 | 3.7 | 2.62 |
| 33 | Kenchi/Dakey | *Ficus exasperate Vahl* | 16.9 | 25.8 | 1.8 | 1.26 |
| 34 | Keresho | *Vernonia amygdalina Del.* | 8.8 | 31 | 1.0 | 0.73 |
| 35 | Kershe | *Polyscias fulva (Hiern) Harms* | 2.8 | 17.5 | 0.2 | 0.11 |
| 36 | Ketewan | *Pittosporum viriflorum Sims* | 4.1 | 21.8 | 0.6 | 0.40 |
| 37 | Keyang | Blighia unijugata Bak. | 45.6 | 14 | 3.1 | 2.23 |
| 38 | kobe | *Celtis zenkeri (A.Rich) wedd* | 81.3 | 17 | 4.0 | 2.86 |
| 39 | koke | *Celtis toka (Forssk. ) hepper.&.Wood* | 32.5 | 33 | 2.0 | 1.46 |
| 40 | Kuri | *Diospyros abyssinica (Hiern) F.White* | 31.6 | 21 | 1.9 | 1.39 |
| 41 | Loresise | *Vernonia amygdalina del* | 15.6 | 24.6 | 1.9 | 1.33 |
| 42 | Manchi buto | *Polyscias fulva (Hiern) Harms* | 4.7 | 10.3 | 1.0 | 0.75 |
| 43 | Mange | *Lecaniodiscus fraxinifolius Bak* | 59.4 | 11.4 | 2.5 | 1.82 |
| 44 | Mangirexxo | *Pentas schimperiana (A. Rich.) Vatke* | 7.8 | 16.6 | 1.1 | 0.78 |
| 45 | Manjo/getema | *Schefflera abyssinica (Hochst. ex A. Rich.) Harms* | 16.9 | 25 | 1.4 | 1.00 |
| 46 | Meregone/Kerewaye | *Ficus ovate Vahl* | 14.1 | 14 | 1.3 | 0.95 |
| 47 | Mergeto | *Vepris dainellii (Pic. Serm.) Kokwaro* | 10.9 | 16.3 | 0.9 | 0.62 |
| 48 | Mesho | *Vernonia auriculifera Hiern* | 11.3 | 16.2 | 0.8 | 0.56 |
| 49 | Omo/tekure enchete | *Triumfetta tomentosa Boj.* | 5.0 | 23.2 | 0.8 | 0.55 |
| 50 | Orero | *Prunus africana (Hook.f.) Kalkm* | 10.6 | 5.3 | 0.9 | 0.61 |
| 51 | Pishino | *Ekebergia capensis Sparrm* | 22.5 | 12.3 | 3.0 | 2.13 |
| 52 | Qararo | *Dracaena afromontana Mildbr.* | 11.3 | 28 | 0.7 | 0.49 |
| 53 | Qero | *Schefflera myriantha (Bak) Drake* | 11.3 | 10 | 0.6 | 0.42 |
| 54 | Qeto | *Pouteria adolfi-friederici (Engl.) Baehni* | 10.0 | 8 | 1.0 | 0.68 |
| 55 | Sanchore | *Margaritaria discoidea (Baill.) Webster* | 18.8 | 16.2 | 2.0 | 1.44 |
| 56 | Sati | *Albizia grandibracteata Taub* | 9.4 | 20 | 1.4 | 0.98 |
| 57 | Semberegn | *Combretum molle R. Br. ex G. Don* | 15.9 | 25.5 | 2.1 | 1.53 |
| 58 | Semeti | *Ficus thonningii Blume* | 3.1 | 15 | 2.1 | 1.53 |
| 59 | Semiyang | *Ficus sur Forssk* | 19.1 | 41 | 1.8 | 1.26 |
| 60 | Seso | *Ilex mitis (L.) Radlk.* | 5.0 | 25 | 1.0 | 0.74 |
| 61 | Setole | *Garcinia buchananii Baker* | 5.0 | 21.8 | 1.9 | 1.33 |
| 62 | Shahiyo | *Lepidotrichilia volkensii (Gurke) Leroy* | 3.8 | 21.5 | 0.8 | 0.59 |
| 63 | Shakkaro | *Macaranga capensis (Baill.) Sim* | 5.3 | 33.8 | 1.0 | 0.72 |
| 64 | Shao | *Allophylus abyssinicus (Hochst.) Radlk.* | 11.3 | 53.8 | 2.6 | 1.83 |
| 65 | Shito | *Bothriocline schimperi Olivo & Hiern ex Benth.* | 7.2 | 14.5 | 0.9 | 0.64 |
| 66 | Shotele | *Leptaspis zeylanica Nees ex Steud.* | 22.8 | 17.6 | 1.0 | 0.70 |
| 67 | Shoto | *Alangium chinense (Lour.) Harms* | 10.3 | 20.25 | 1.0 | 0.74 |
| 68 | Shukushi | *Alangium chinense (Lour.) Harms* | 5.0 | 21.5 | 1.9 | 1.33 |
| 69 | Sinsino | *Cyathea manniana Hook* | 24.1 | 28.3 | 2.8 | 2.01 |
| 70 | Sisi | *Olea capensis L.* | 7.5 | 23.6 | 1.1 | 0.77 |
| 71 | Sokoshi | *Pouteria alnifolia (Bak.) Roberty* | 32.5 | 51.3 | 2.1 | 1.53 |
| 72 | Somoye/Shomo/ | *Croton sylvaticus Krauss* | 10.6 | 12.8 | 1.9 | 1.34 |
| 73 | Songoboye | *Ficus exasperata Vahl* | 6.3 | 16.4 | 2.0 | 1.43 |
| 74 | Tengi | *Antiaris toxicaria Resch* | 48.4 | 14.8 | 2.5 | 1.82 |
| 75 | Tokun | *Apodytes dimidiata E. Mey. ex Arn.* | 8.1 | 28.3 | 1.3 | 0.95 |
| 76 | Ufo | *Trema orientalis (L.) Bl.* | 4.4 | 24.3 | 1.0 | 0.72 |
| 77 | Upuye | *Celtis africana Burm.f.* | 9.7 | 17.5 | 1.2 | 0.86 |
| 78 | Usume | *Buddleja polystachya Fresen.* | 6.3 | 27.5 | 1.2 | 0.86 |
| 79 | Wagaamo | *Ehretia cymosa Thonn.* | 7.5 | 20.2 | 1.0 | 0.72 |
| 80 | Washo | *Elaeodendron buchananii (Loes.) Loes.* | 10.0 | 40.9 | 1.0 | 0.72 |
| 81 | Weralo | *Cassipourea malosana (Baker) Alston* | 10.3 | 42.2 | 0.9 | 0.62 |
| 82 | Woleloye | Dombeya torrida (J.F.Gmel.) P. Bamps | 4.7 | 16.5 | 1.2 | 0.86 |
| 83 | Woni | Mimusops lanceolata A.DC | 14.1 | 26.78 | 2.5 | 1.79 |
| 84 | Worango | *Flacourtia indica (Burm.f.) Merril* | 11.3 | 18.8 | 1.0 | 0.74 |
| 85 | Worege | *Millettia ferruginea (Hochst.) Baker* | 10.9 | 25.5 | 0.9 | 0.63 |
| 86 | Xixiribbo | *Canthium oligocarpum Hiern* | 6.3 | 18 | 0.8 | 0.55 |
| 87 | Yaahoo | *Phoenix reclinata Jacq.* | 8.1 | 21 | 1.0 | 0.70 |
| 88 | Yaayyo | *Olea welwitschii (Knobl.) Gilg & Schellenb.* | 7.8 | 21.5 | 1.0 | 0.68 |
| 89 | Yabbo | *Fagaropsis angolensis (Engl.) Dale* | 4.7 | 24.4 | 1.0 | 0.68 |
| 90 | Yago/berebere | *Millettia ferruginea (Hochst.) Bak.* | 4.7 | 22 | 0.8 | 0.56 |
| 91 | Yeno | *Trilepisium madagascariense DC* | 17.8 | 18.5 | 2.5 | 1.77 |
| 92 | Yuddo | *Dracaena steudneri Engler* | 8.8 | 23.3 | 1.0 | 0.68 |
| 93 | Yuye | *Deinbollia Kilimandschrica Taub* | 14.4 | 25 | 2.1 | 1.53 |
| 94 | Zeme/Jeme | *Lannea welwitschii (Hiern) Engl.* | 15.0 | 12.9 | 2.4 | 1.74 |
|  |  |  | **1350.0** |  | **139.8** | **99.99** |

**Appendix 13: Basal area per ha in site I of the MFBR**

| **No** | **Species Name** | **Species Scintific Name** | **D** | **Average DBH** | **BA(m2/ha)** | **Percentage of BA** |
| --- | --- | --- | --- | --- | --- | --- |
| 1 | Abe | *Ficus mucuso (Ficatho)* | 31.25 | 27.5 | 2.60 | 3.88 |
| 2 | Beni | *Allophylus macrobotrys Gilg* | 5 | 6 | 0.45 | 0.67 |
| 3 | Boyti | *Oxyanthus speciosus DC* | 10 | 44 | 0.85 | 1.27 |
| 4 | Dampe | *Cordia Africana Lam.* | 22.5 | 44.5 | 2.60 | 3.88 |
| 5 | Dasoye | *Mallotus oppositifolius (Geisel) Mull* | 48.75 | 12 | 1.43 | 2.13 |
| 6 | Didoye | *Fagaropsis angolensis (Engl.) Dale* | 3.75 | 43 | 0.35 | 0.52 |
| 7 | Duwe | *Baphia abyssinica Brummit* | 80 | 20.5 | 3.00 | 4.48 |
| 8 | Ebi | *Dracaena steudneri Engl* | 3.75 | 26 | 0.35 | 0.52 |
| 9 | Elemasoye | *Vernonia hochstetteri Sch.Bip.ex.Walp* | 11.25 | 16.5 | 0.64 | 0.95 |
| 10 | Erere | Ritchiea albersii Gilg | 21.25 | 15.5 | 1.23 | 1.83 |
| 11 | Eruye | Lepisnthes senegalensis (Juss.ex.poir) Leenh | 8.75 | 12.9 | 0.54 | 0.81 |
| 12 | Esek | Morus mesozygia Stapf. | 22.5 | 21.6 | 0.99 | 1.48 |
| 13 | Gegin | *Erythroxylum fischeri Engl.* | 28.75 | 8 | 0.98 | 1.47 |
| 14 | Gele | Trichilia prieuriana A.juss | 53.75 | 20 | 1.54 | 2.30 |
| 15 | Geltegni | *Teclea nobilis Del.* | 30 | 13.5 | 1.54 | 2.30 |
| 16 | Gidi | Croton macrostachyus Del. | 25 | 30 | 1.86 | 2.78 |
| 17 | Goboye | *Grewia mollis A. Juss.* | 36.25 | 25.8 | 1.33 | 1.98 |
| 18 | Goje | Manilkara butugi Chiov | 33.75 | 63 | 1.86 | 2.78 |
| 19 | Gomuye | *Pouteria altissima (A.Chev.) Baehni* | 77.5 | 27 | 2.54 | 3.79 |
| 20 | Kari | Coffea arabica L. | 10 | 4 | 0.80 | 1.20 |
| 21 | Kenchi/Dakey | *Ficus exasperate Vahl* | 33.75 | 44 | 1.43 | 2.13 |
| 22 | Ketewan | *Pittosporum viriflorum Sims* | 13.75 | 7 | 0.47 | 0.69 |
| 23 | Keyang | Blighia unijugata Bak. | 115 | 19 | 1.95 | 2.90 |
| 24 | kobe | *Celtis zenkeri (A.Rich) wedd* | 93.75 | 20.5 | 3.36 | 5.02 |
| 25 | koke | *Celtis toka (Forssk. ) hepper.&.Wood* | 42.5 | 15.5 | 3.08 | 4.59 |
| 26 | Kuri | *Diospyros abyssinica (Hiern) F.White* | 42.5 | 16.7 | 2.66 | 3.96 |
| 27 | Loresise | *Vernonia amygdalina del* | 3.75 | 14.2 | 0.74 | 1.10 |
| 28 | Mange | *Lecaniodiscus fraxinifolius Bak.* | 58.75 | 15 | 2.54 | 3.79 |
| 29 | Sanchore | *Margaritaria discoidea (Baill.) Webster* | 48.75 | 16 | 1.54 | 2.30 |
| 30 | Semberegn | *Combretum molle R. Br. ex G. Don* | 53.75 | 31 | 2.14 | 3.19 |
| 31 | Semeti | *Ficus thonningii Blume* | 20 | 17.5 | 1.33 | 1.98 |
| 32 | Semiyang | *Ficus sur Forssk* | 6.25 | 21.8 | 0.43 | 0.64 |
| 33 | Setole | *Garcinia buchananii Baker* | 26.25 | 14 | 1.33 | 1.98 |
| 34 | Shotele | *Leptaspis zeylanica Nees ex Steud.* | 7.5 | 17 | 1.25 | 1.86 |
| 35 | Shukushi | *Alangium chinense (Lour.) Harms* | 31.25 | 21 | 1.54 | 2.30 |
| 36 | Sokoshi | *Olea capensis L.* | 71.25 | 24.6 | 0.65 | 0.97 |
| 37 | Somoye | *Pouteria alnifolia (Bak.) Roberty* | 8.75 | 10.3 | 1.33 | 1.98 |
| 38 | Songoboye | *Croton sylvaticus Krauss* | 25 | 11.4 | 0.57 | 0.85 |
| 39 | Tengi | *Ficus exasperata Vahl* | 57.5 | 16.6 | 1.86 | 2.78 |
| 40 | Tokun | *Antiaris toxicaria Resch* | 3.75 | 25 | 0.36 | 0.54 |
| 41 | Upuye | *Apodytes dimidiata E. Mey. ex Arn.* | 22.5 | 14 | 0.95 | 1.42 |
| 42 | Usume | *Celtis africana Burm.f.* | 12.5 | 16.3 | 0.79 | 1.17 |
| 43 | Woni | *Buddleja polystachya Fresen.* | 37.5 | 23.2 | 1.54 | 2.30 |
| 44 | Worege | Mimusops lanceolata A.DC | 25 | 5.3 | 0.50 | 0.74 |
| 45 | Yuye | *Millettia ferruginea (Hochst.) Baker* | 5 | 12.3 | 0.38 | 0.57 |
| 46 | Zeme/Jeme | *Deinbollia Kilimandschrica Taub* | 47.5 | 28 | 1.33 | 1.98 |
|  | |  |  |  | **63.49** | **94.71** |

**Appendix 14: Basal area per ha in site II of the MFBR**

| No | Species Name | Species Scientific Name | D | Average DBH | BA(m2/ha) | Percentage of BA |
| --- | --- | --- | --- | --- | --- | --- |
| 1 | Abe | *Ficus mucuso (Ficatho)* | 45 | 27.5 | 2.01 | 3.54 |
| 2 | Beni | *Allophylus macrobotrys Gilg* | 23 | 6 | 0.94 | 1.66 |
| 3 | Bobokoye | *Rothmannia urceliformis (Hiern) Robyns* | 15 | 11 | 0.86 | 1.51 |
| 4 | Boyti | *Oxyanthus speciosus DC* | 17 | 44 | 0.84 | 1.48 |
| 5 | Dampe | *Cordia Africana Lam.* | 60 | 44.5 | 3.87 | 6.81 |
| 6 | Dasoye | *Mallotus oppositifolius (Geisel) Mull* | 16 | 12 | 0.75 | 1.32 |
| 7 | Didoye | *Fagaropsis angolensis (Engl.) Dale* | 20 | 43 | 1.12 | 1.97 |
| 8 | Duwe | *Baphia abyssinica Brummit* | 70 | 20.5 | 3.10 | 5.46 |
| 9 | Ebi | *Dracaena steudneri Engl* | 16 | 26 | 0.91 | 1.60 |
| 10 | Erere | *Ritchiea albersii Gilg* | 45 | 15.5 | 1.01 | 1.78 |
| 11 | Esek | *Morus mesozygia Stapf.* | 15 | 21.6 | 1.02 | 1.80 |
| 12 | Gele | *Trichilia prieuriana A.juss* | 29 | 20 | 2.51 | 4.42 |
| 13 | Geltegni | *Teclea nobilis Del.* | 10 | 13.5 | 0.05 | 0.08 |
| 14 | Goboye | *Grewia mollis A. Juss.* | 33 | 25.8 | 2.35 | 4.14 |
| 15 | Gomuye | *Pouteria altissima (A.Chev.) Baehni* | 103 | 27 | 4.03 | 7.09 |
| 16 | Kenchi/Dakey | *Ficus exasperate Vahl* | 38 | 44 | 1.34 | 2.36 |
| 17 | Kershe | *Polyscias fulva (Hiern) Harms* | 10 | 5 | 0.04 | 0.07 |
| 18 | Ketewan | *Pittosporum viriflorum Sims* | 11 | 7 | 0.05 | 0.09 |
| 19 | Keyang | *Blighia unijugata Bak.* | 32 | 19 | 2.69 | 4.73 |
| 20 | kobe | *Celtis zenkeri (A.Rich) wedd* | 88 | 20.5 | 3.12 | 5.49 |
| 21 | koke | *Celtis toka (Forssk. ) hepper.&.Wood* | 32 | 15.5 | 1.32 | 2.32 |
| 22 | Kuri | *Diospyros abyssinica (Hiern) F.White* | 18 | 16.7 | 1.23 | 2.16 |
| 23 | Loresise | *Vernonia amygdalina del* | 27 | 14.2 | 1.20 | 2.11 |
| 24 | Mange | *Lecaniodiscus fraxinifolius Bak.* | 101 | 15 | 2.71 | 4.77 |
| 25 | Meregone/Kerewaye | *Ficus ovate Vahl* | 29 | 10 | 0.92 | 1.62 |
| 26 | Sanchore | *Margaritaria discoidea (Baill.) Webster* | 17 | 16 | 1.23 | 2.16 |
| 27 | Sati | *Albizia grandibracteata Taub* | 26 | 25.5 | 0.08 | 0.14 |
| 28 | Semberegn | *Combretum molle R. Br. ex G. Don* | 14 | 31 | 0.94 | 1.65 |
| 29 | Semiyang | *Ficus sur Forssk* | 42 | 21.8 | 1.20 | 2.11 |
| 30 | Sisi | *Olea capensis L.* | 19 | 33 | 0.62 | 1.09 |
| 31 | Sokoshi | *Pouteria alnifolia (Bak.) Roberty* | 46 | 21 | 0.99 | 1.74 |
| 32 | Somoye | *Croton sylvaticus Krauss* | 22 | 24.6 | 1.26 | 2.22 |
| 33 | Songoboye | *Ficus exasperata Vahl* | 23 | 10.3 | 0.89 | 1.57 |
| 34 | Tengi | *Antiaris toxicaria Resch* | 62 | 16.6 | 2.23 | 3.92 |
| 35 | Tokun | *Apodytes dimidiata E. Mey. ex Arn.* | 16 | 25 | 0.09 | 0.16 |
| 36 | Usume | *Buddleja polystachya Fresen.* | 9 | 16.3 | 0.16 | 0.28 |
| 37 | Woleloye | *Dombeya torrida (J.F.Gmel.) P. Bamps* | 9 | 16.2 | 0.15 | 0.27 |
| 38 | Woni | *Mimusops lanceolata A.DC* | 12 | 23.2 | 2.16 | 3.80 |
| 39 | Worege | *Millettia ferruginea (Hochst.) Baker* | 23 | 5.3 | 0.89 | 1.57 |
| 40 | Yuye | *Deinbollia Kilimandschrica Taub* | 31 | 12.3 | 1.12 | 1.97 |
| 41 | Zeme/Jeme | *Lannea welwitschii (Hiern) Engl.* | 44 | 28 | 2.82 | 4.96 |
|  |  |  | **1318** |  | **56.82** | **100.00** |

**Appendix 15: Basal area per ha in site III of the MFBR**

| **No** | **Species Name** | **Species Scintific Name** |  | **D** | **Average DBH** | **BA(m2/ha)** | **Percentage of BA** |
| --- | --- | --- | --- | --- | --- | --- | --- |
| 1 | Abe | *Ficus mucuso (Ficatho)* |  | 20 | 27.5 | 2.01 | 3.68 |
| 2 | Dampe | *Cordia Africana Lam.* |  | 54 | 44.5 | 3.21 | 5.88 |
| 3 | Dasoye | *Mallotus oppositifolius (Geisel) Mull* |  | 28 | 12 | 0.75 | 1.37 |
| 4 | Duwe | *Baphia abyssinica Brummit* |  | 44 | 20.5 | 2.57 | 4.71 |
| 5 | Ebi | *Dracaena steudneri Engl* |  | 15 | 26 | 0.91 | 1.67 |
| 6 | Elemasoye | *Vernonia hochstetteri Sch.Bip.ex.Walp* |  | 13 | 16.5 | 0.89 | 1.63 |
| 7 | Erere | Ritchiea albersii Gilg |  | 26 | 15.5 | 1.01 | 1.85 |
| 8 | Eruye | Lepisnthes senegalensis (Juss.ex.poir) Leenh |  | 19 | 12.9 | 0.86 | 1.58 |
| 9 | Esek | Morus mesozygia Stapf. |  | 50 | 21.6 | 1.02 | 1.87 |
| 10 | Gele | Trichilia prieuriana A.juss |  | 23 | 20 | 1.56 | 2.86 |
| 11 | Geltegni | *Teclea nobilis Del.* |  | 16 | 13.5 | 0.05 | 0.09 |
| 12 | Goboye | *Grewia mollis A. Juss.* |  | 31 | 25.8 | 2.12 | 3.89 |
| 13 | Goje | Manilkara butugi Chiov |  | 13 | 63 | 1.75 | 3.21 |
| 14 | Gomuye | *Pouteria altissima (A.Chev.) Baehni* |  | 79 | 27 | 3.87 | 7.09 |
| 15 | Keyang | Blighia unijugata Bak. |  | 55 | 19 | 2.69 | 4.93 |
| 16 | kobe | *Celtis zenkeri (A.Rich) wedd* |  | 138 | 20.5 | 4.25 | 7.79 |
| 17 | koke | *Celtis toka (Forssk. ) hepper.&.Wood* |  | 58 | 15.5 | 2.32 | 4.25 |
| 18 | Kuri | *Diospyros abyssinica (Hiern) F.White* |  | 84 | 16.7 | 2.23 | 4.09 |
| 19 | Loresise | *Vernonia amygdalina del* |  | 29 | 14.2 | 1.20 | 2.20 |
| 20 | Mange | *Lecaniodiscus fraxinifolius Bak.* |  | 79 | 15 | 2.61 | 4.78 |
| 21 | Meregone/Kerewaye | *Ficus ovate Vahl* |  | 22 | 10 | 0.92 | 1.69 |
| 22 | Sanchore | *Margaritaria discoidea (Baill.) Webster* |  | 14 | 16 | 1.23 | 2.25 |
| 23 | Sati | *Albizia grandibracteata Taub* |  | 3 | 18 | 0.08 | 0.15 |
| 24 | Semberegn | *Combretum molle R. Br. ex G. Don* |  | 8 | 31 | 0.94 | 1.72 |
| 25 | Semiyang | *Ficus sur Forssk* |  | 24 | 21.8 | 1.20 | 2.20 |
| 26 | Shotele | *Leptaspis zeylanica Nees ex Steud.* |  | 22 | 33 | 0.62 | 1.14 |
| 27 | Sisi | *Olea capensis L.* |  | 10 | 21 | 0.88 | 1.61 |
| 28 | Sokoshi | *Pouteria alnifolia (Bak.) Roberty* |  | 25 | 24.6 | 1.26 | 2.31 |
| 29 | Somoye | *Croton sylvaticus Krauss* |  | 24 | 11.4 | 1.12 | 2.05 |
| 30 | Tengi | *Antiaris toxicaria Resch* |  | 85 | 16.6 | 3.01 | 5.52 |
| 31 | Tokun | *Apodytes dimidiata E. Mey. ex Arn.* |  | 14 | 25 | 0.09 | 0.16 |
| 32 | Upuye | *Celtis africana Burm.f.* |  | 21 | 14 | 0.81 | 1.48 |
| 33 | Usume | *Buddleja polystachya Fresen.* |  | 18 | 16.3 | 0.16 | 0.29 |
| 34 | Woleloye | Dombeya torrida (J.F.Gmel.) P. Bamps |  | 12 | 16.3 | 0.15 | 0.28 |
| 35 | Woni | Mimusops lanceolata A.DC |  | 11 | 23.2 | 2.16 | 3.96 |
| 36 | Yuye | *Deinbollia Kilimandschrica Taub* |  | 14 | 12.3 | 1.03 | 1.89 |
| 37 | Zeme/Jeme | *Lannea welwitschii (Hiern) Engl.* |  | 31 | 28 | 1.01 | 1.85 |
|  |  |  |  | **1232** |  | **54.80** | **100.00** |

**Appendix 16: Basal area per ha in site IV of the MFBR**

| **No** | **Species Name (site IV)** | **Specie Scintic Name** | **D** | **Average DBH** | **BA(m2/ha)** | **Percentage of BA** |
| --- | --- | --- | --- | --- | --- | --- |
| 1 | Amato | *Pycnostachys eminii Gurke,* | 34 | 17 | 1.84 | 2.41 |
| 2 | Ayimoto | *Psychotria orophila Petit* | 18 | 14 | 1.25 | 1.63 |
| 3 | Bunoo | *Bersama abyssinica Fresen* | 15 | 14 | 0.75 | 0.99 |
| 4 | Boqo/Boko | *Coffea arabica L.* | 10 | 10 | 0.64 | 0.83 |
| 5 | Caatto | *Albizia Schimperiana Oliv.* | 32 | 16 | 1.63 | 2.13 |
| 6 | Chato/sesa | *Albizia gummifera (J.F.Gmel.) C.A. Sm.* | 29 | 16 | 2.01 | 2.64 |
| 7 | Coqimato | *Dracaena afromontana Mildbr.* | 35 | 16 | 2.01 | 2.64 |
| 8 | Dao/wanza | *Alangium chinense (Lour.) Harms* | 16 | 14 | 3.46 | 4.54 |
| 9 | Dibo | *Rothmannia urcelliformis (Hiern) Robyns* | 26 | 16 | 2.01 | 2.64 |
| 10 | Dido | *Galiniera saxifraga (Hochst.) Bridson* | 52 | 18 | 3.36 | 4.41 |
| 11 | Eqibelo | *Solanecio mannii (Hook. f) C. Jeffrey* | 24 | 16 | 1.63 | 2.13 |
| 12 | Eto/shola | *Ficus sur Forssk.* | 19 | 17 | 3.27 | 4.28 |
| 13 | Gachoo | *Euphorbia ampliphylla Pax* | 17 | 16 | 1.63 | 2.13 |
| 14 | Keresho | *Vernonia amygdalina Del.* | 28 | 15 | 1.43 | 1.88 |
| 15 | Manchi buto | *Polyscias fulva (Hiern) Harms* | 15 | 14 | 1.25 | 1.63 |
| 16 | Manjo/getema | *Pentas schimperiana (A. Rich.) Vatke* | 54 | 18 | 2.06 | 2.70 |
| 17 | Mangirexxo | *Schefflera abyssinica (Hochst. ex A. Rich.) Harms* | 25 | 16 | 1.29 | 1.69 |
| 18 | Mergeto | *Vepris dainellii (Pic. Serm.) Kokwaro* | 35 | 14 | 1.25 | 1.63 |
| 19 | Mesho | *Vernonia auriculifera Hiern* | 36 | 15 | 1.43 | 1.88 |
| 20 | Omo/tekure enchete | *Triumfetta tomentosa Boj.* | 16 | 13 | 1.33 | 1.74 |
| 21 | Orero | *Prunus africana (Hook.f.) Kalkm* | 34 | 17 | 1.45 | 1.90 |
| 22 | Pishino | *Ekebergia capensis Sparrm* | 72 | 25 | 3.97 | 5.21 |
| 23 | Qero | *Dracaena afromontana Mildbr.* | 36 | 10 | 0.79 | 1.03 |
| 24 | Qararo | *Schefflera myriantha (Bak) Drake* | 36 | 14 | 0.98 | 1.29 |
| 25 | Qeto | *Pouteria adolfi-friederici (Engl.) Baehni* | 32 | 16 | 1.63 | 2.13 |
| 26 | Seso | *Ilex mitis (L.) Radlk.* | 16 | 15 | 1.43 | 1.88 |
| 27 | Shahiyo | *Lepidotrichilia volkensii (Gurke) Leroy* | 12 | 12 | 1.02 | 1.34 |
| 28 | Shakkaro | *Macaranga capensis (Baill.) Sim* | 17 | 14 | 1.25 | 1.63 |
| 29 | Shao | *Allophylus abyssinicus (Hochst.) Radlk.* | 36 | 18 | 3.08 | 4.04 |
| 30 | Shomo/besana | *Bothriocline schimperi Olivo & Hiern ex Benth.* | 24 | 15 | 1.43 | 1.88 |
| 31 | Shito | *Croton macrostachyus Del.* | 23 | 16 | 1.29 | 1.69 |
| 32 | Shoto | *Alangium chinense (Lour.) Harms* | 33 | 16 | 1.63 | 2.13 |
| 33 | Sinsino | *Cyathea manniana Hook* | 77 | 21 | 2.80 | 3.68 |
| 34 | Ufo | *Trema orientalis (L.) Bl.* | 14 | 13 | 1.33 | 1.74 |
| 35 | Wagaamo | *Ehretia cymosa Thonn.* | 24 | 15 | 1.43 | 1.88 |
| 36 | Washo | *Elaeodendron buchananii (Loes.) Loes.* | 32 | 15 | 1.43 | 1.88 |
| 37 | Weralo | *Cassipourea malosana (Baker) Alston* | 33 | 13 | 1.07 | 1.41 |
| 38 | Worango | *Flacourtia indica (Burm.f.) Merril* | 36 | 15 | 1.13 | 1.48 |
| 39 | Xixiribbo | *Canthium oligocarpum Hiern* | 20 | 14 | 1.25 | 1.63 |
| 40 | Yabbo | *Phoenix reclinata Jacq.* | 26 | 11 | 1.37 | 1.79 |
| 41 | Yaahoo | *Olea welwitschii (Knobl.) Gilg & Schellenb.* | 25 | 16 | 1.63 | 2.13 |
| 42 | Yaayyo | *Fagaropsis angolensis (Engl.) Dale* | 15 | 15 | 1.43 | 1.88 |
| 43 | Yago/berebere | *Millettia ferruginea (Hochst.) Bak.* | 15 | 14 | 1.25 | 1.63 |
| 44 | Yeno | *Trilepisium madagascariense DC* | 57 | 17 | 3.27 | 4.28 |
| 45 | Yuddo | *Dracaena steudneri Engler* | 28 | 15 | 1.43 | 1.88 |
|  | **Total** |  | **1309** |  | **76.26** | **100.00** |
